# Supplementary material for: Metal-free synthesis of 1,3,5-trisubstituted benzenes by the cyclotrimerization of enaminones or alkynes in water
Source: Royal Society of Chemistry journal article supplement (doi:10.1039/c4ra00475b), 2014-01-01

## **Metal-free synthesis of 1,3,5-trisubstituted benzenes by the cyclotrimerization of enamines or alkynes in water**

Jie-Ping Wan,<sup>\*a,b</sup> Yunfang Lin<sup>a</sup> Kaikai Hu<sup>a</sup> and Yunyun Liu<sup>\*a,b</sup>

<sup>a</sup>College of Chemistry and chemical engineering, Jiangxi Normal University, Nanchang 330022, P. R. of China.

<sup>b</sup>Key laboratory of functional small organic molecules, ministry of education, Jiangxi Normal University, Nanchang 330022, P. R. of China.

Email: wanjieping@gmail.com; chemliuyunyun@gmail.com

### **General experimental information**

All experiments were carried out at open atmosphere, enamines used in the experiment were prepared following literature method,<sup>1</sup> and all other chemicals were obtained from commercial resource and used without further purification. Deionized water was used for reactions involving water as solvent. <sup>1</sup>H and <sup>13</sup>C NMR were recorded in 400 MHz apparatus (AVANCE 400, Bruker) or 600 MHz apparatus (600MHz DD2, Agilent). The chemical shifts were reported in ppm using TMS as internal standard. Melting points were tested in X-4A instrument without correcting temperature, IR were measured in KBr method and the HRMS were obtained under ESI model.

$^1\text{H}$  and  $^{13}\text{C}$  NMR spectra of **3a**

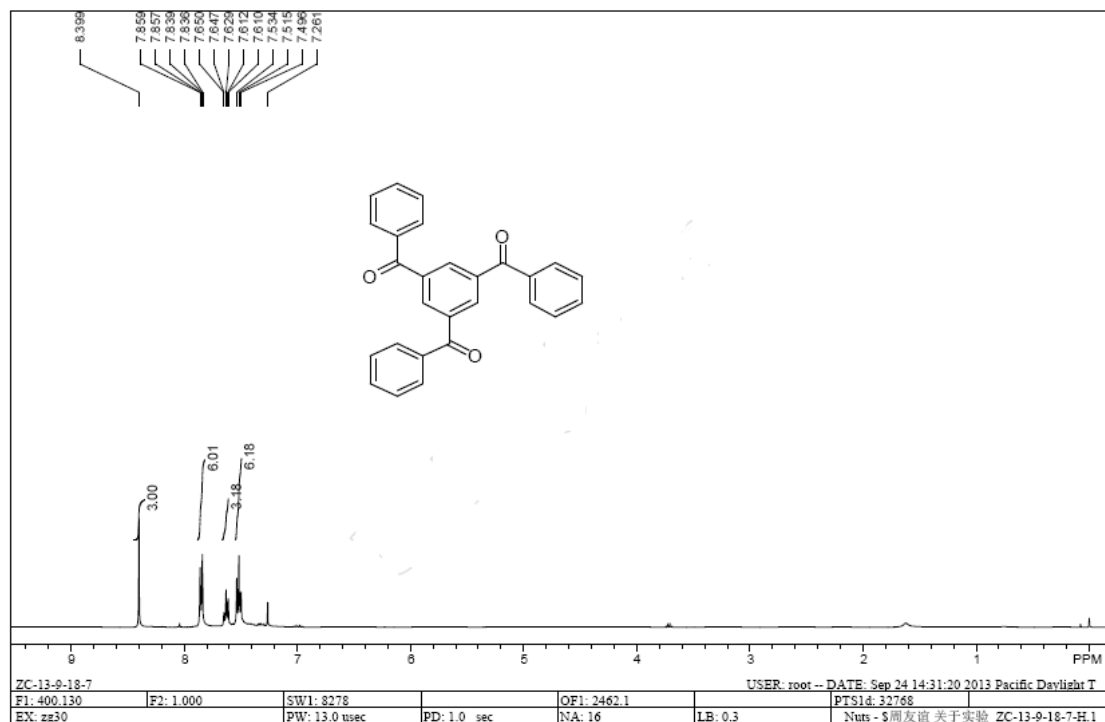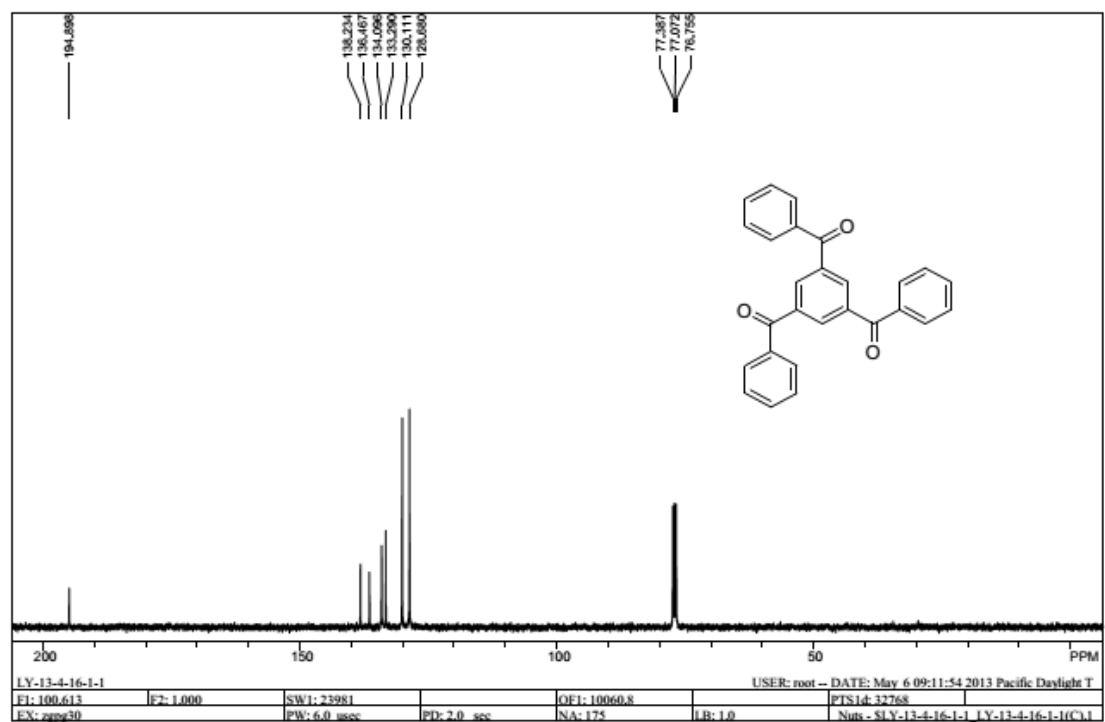

$^1\text{H}$  and  $^{13}\text{C}$  NMR spectra of **3b**

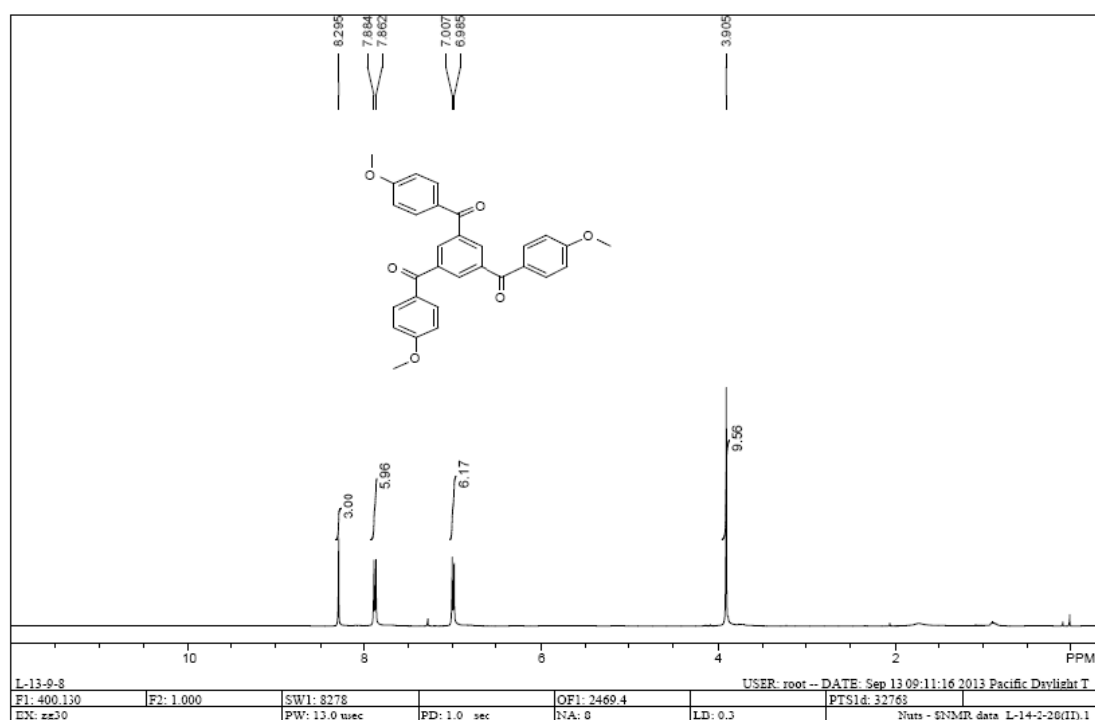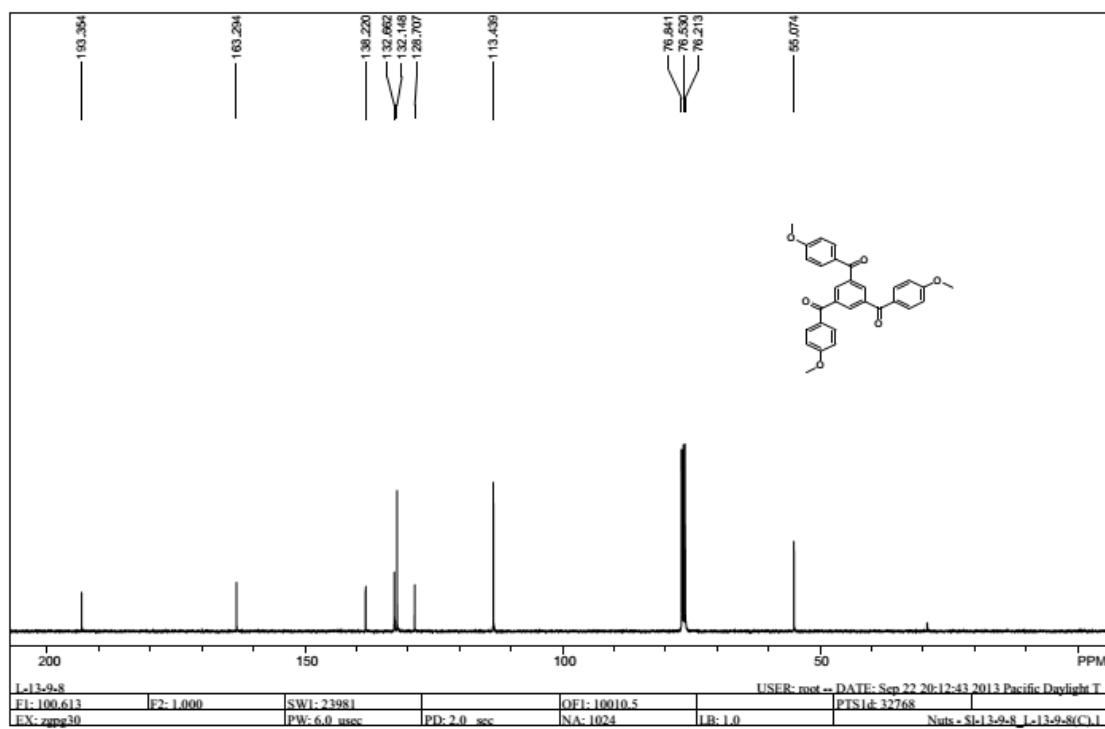

$^1\text{H}$  and  $^{13}\text{C}$  NMR spectra of **3c**

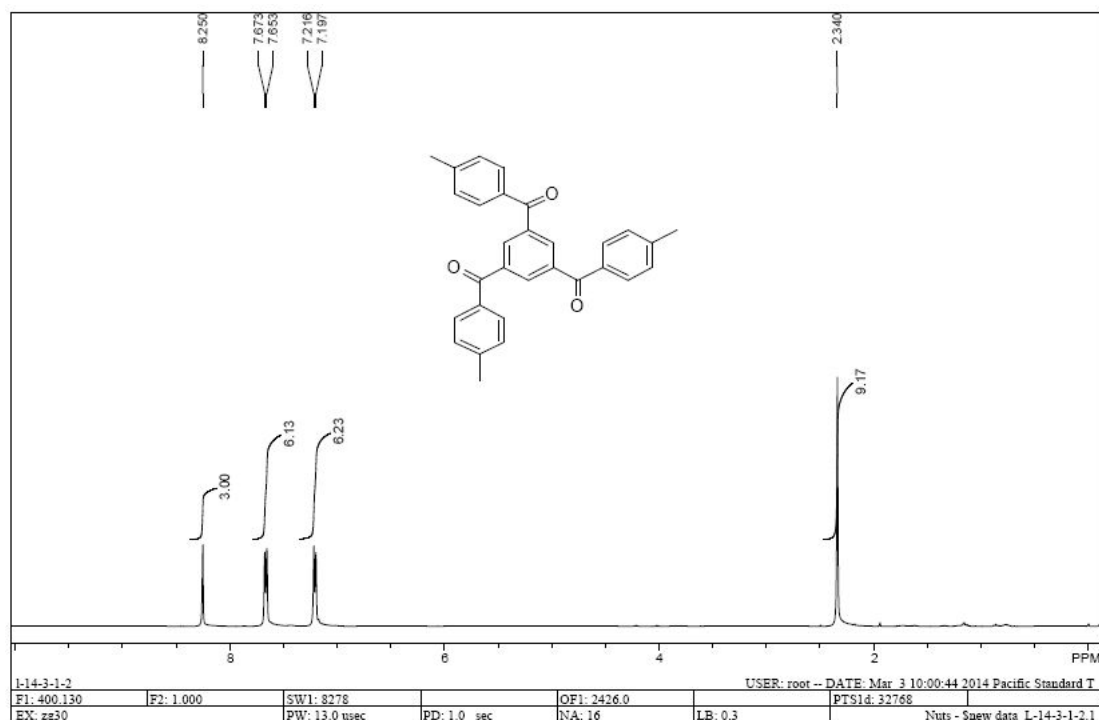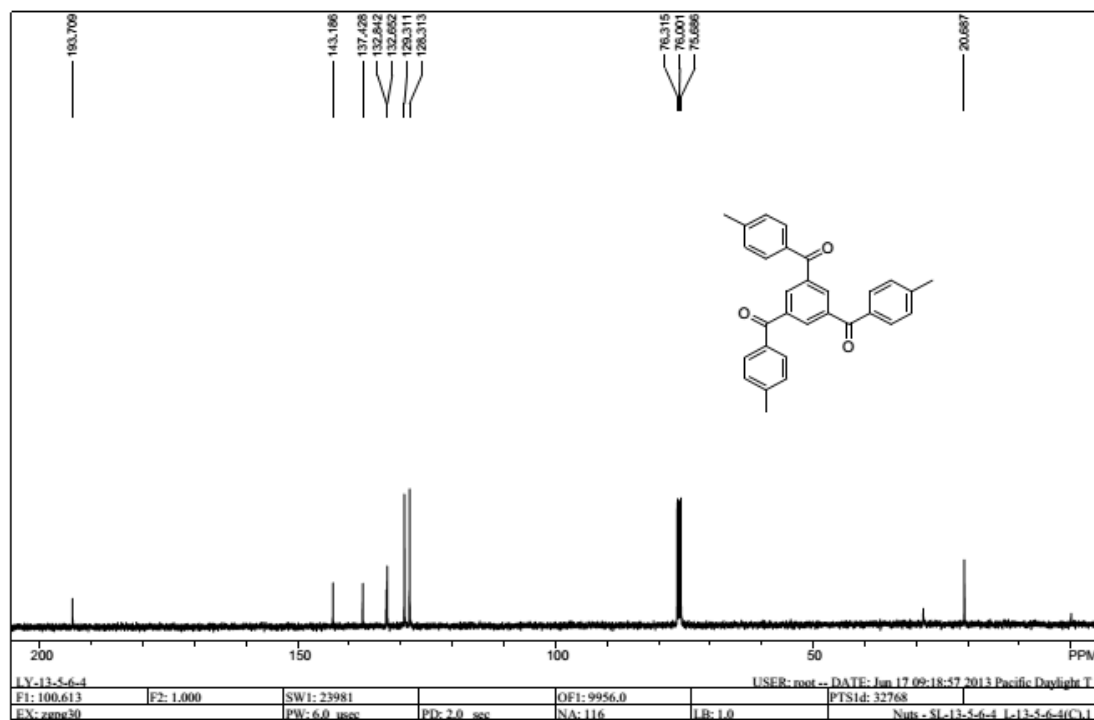

$^1\text{H}$  and  $^{13}\text{C}$  NMR spectra of **3d**

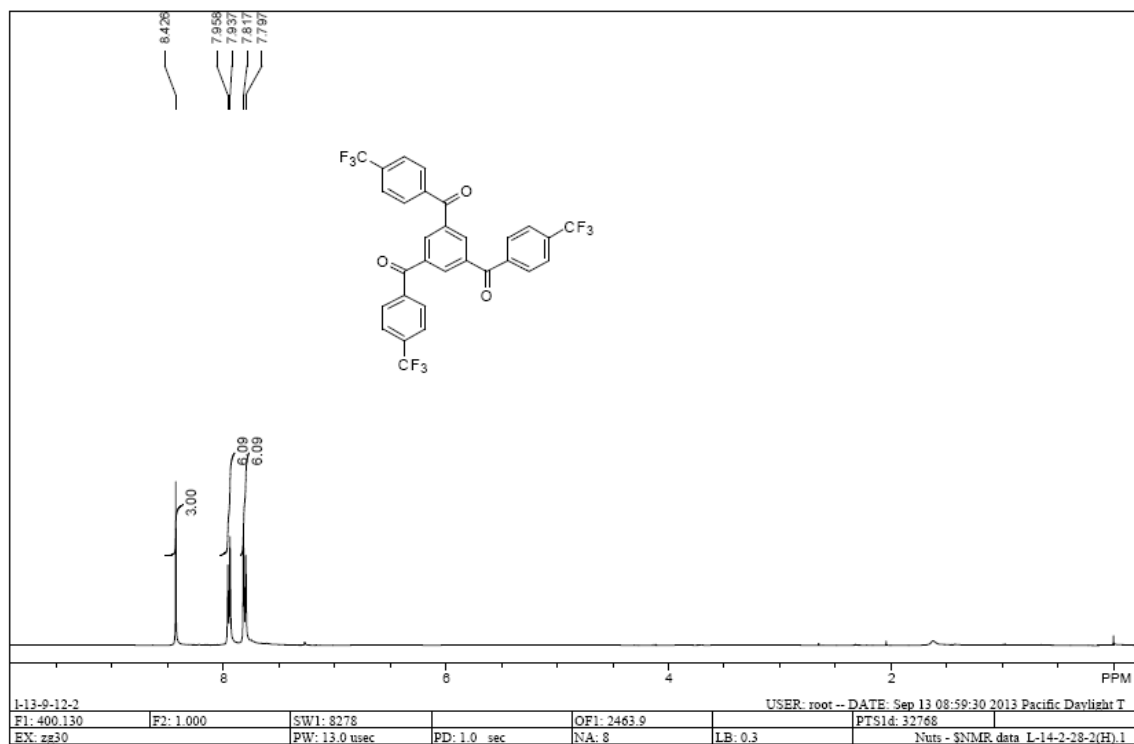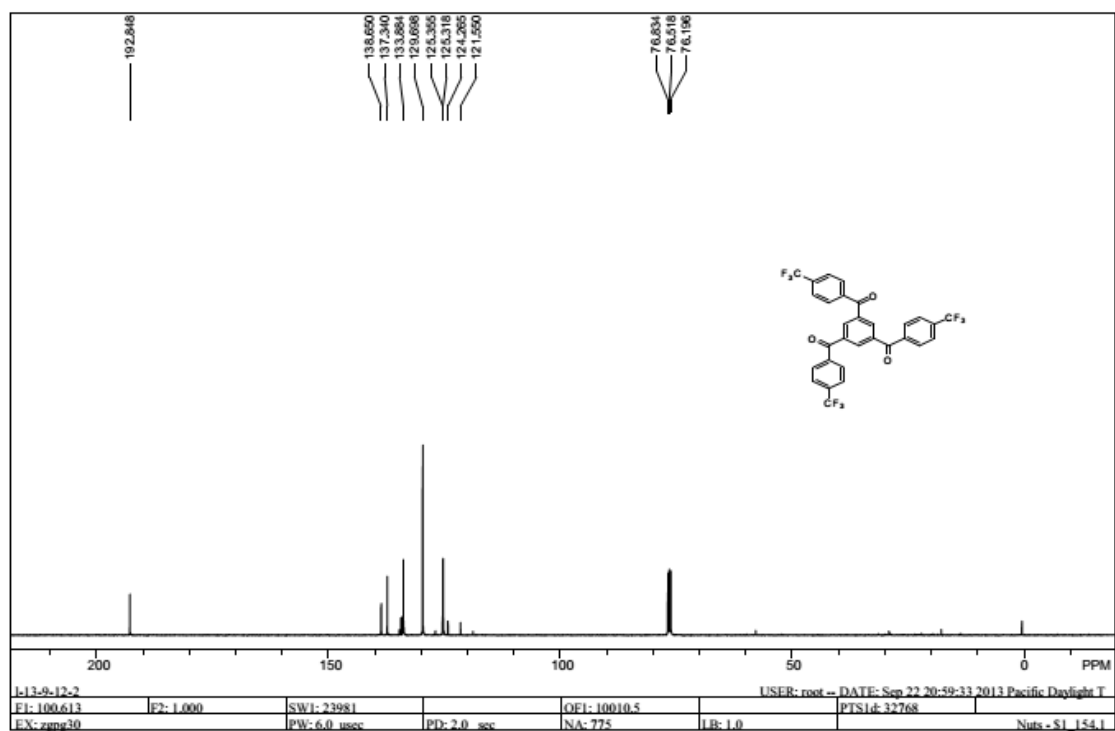

$^1\text{H}$  and  $^{13}\text{C}$  NMR spectra of **3e** (Measured in  $\text{DMSO-}d_6$ )

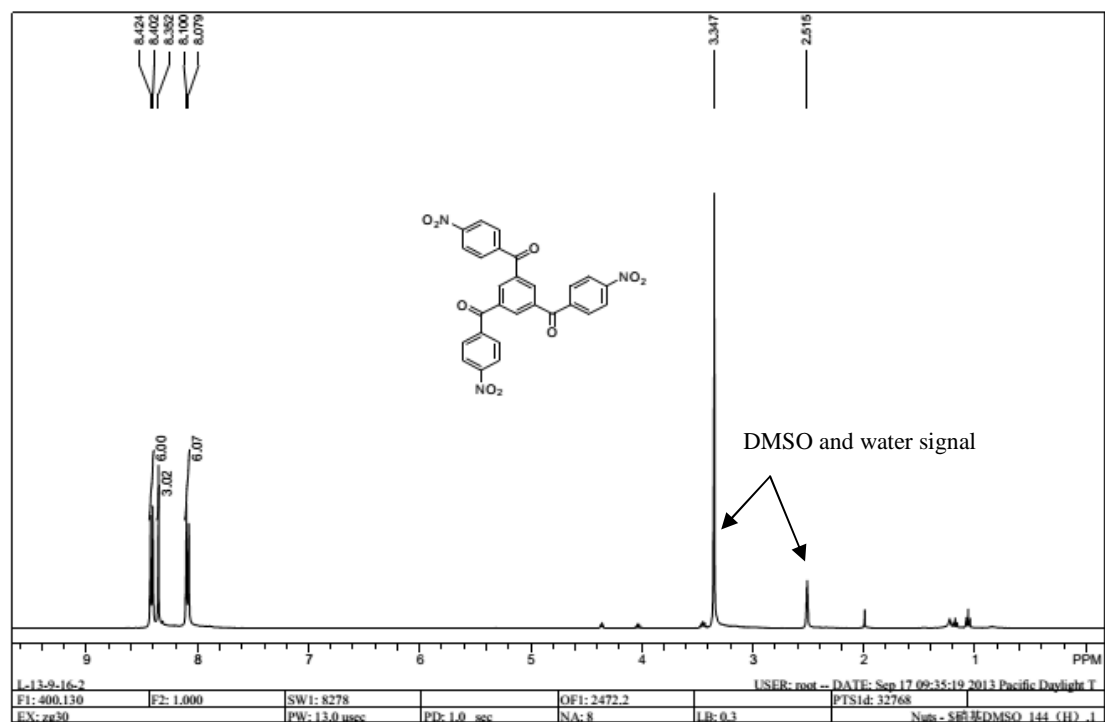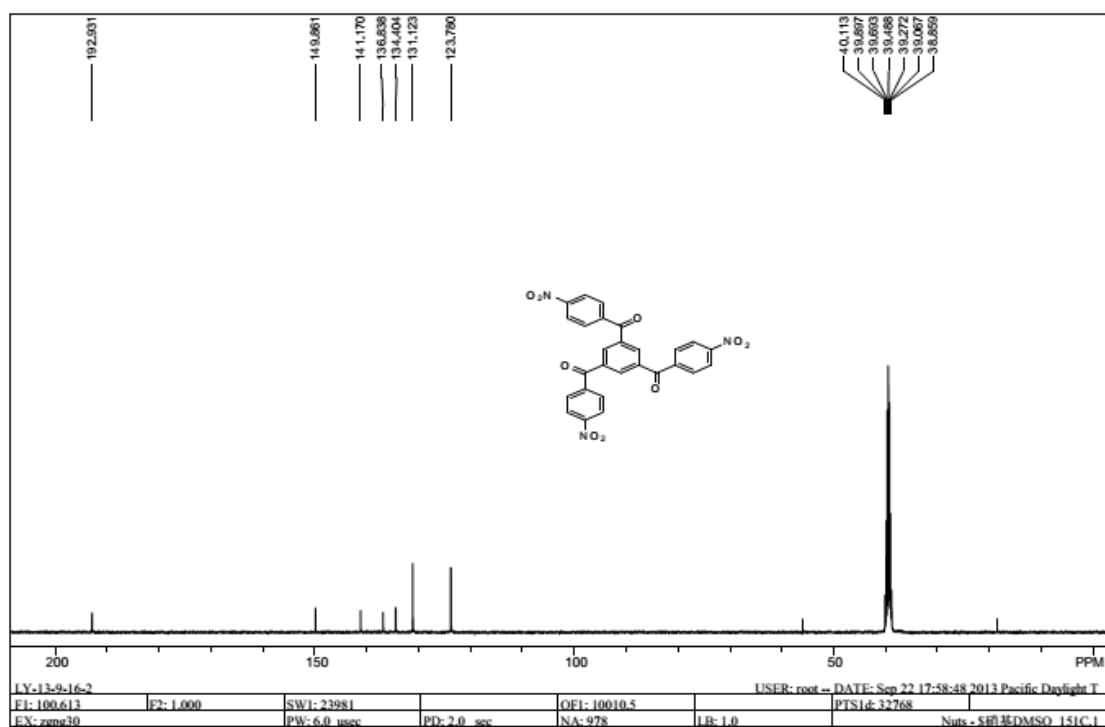

$^1\text{H}$  and  $^{13}\text{C}$  NMR spectra of **3f**

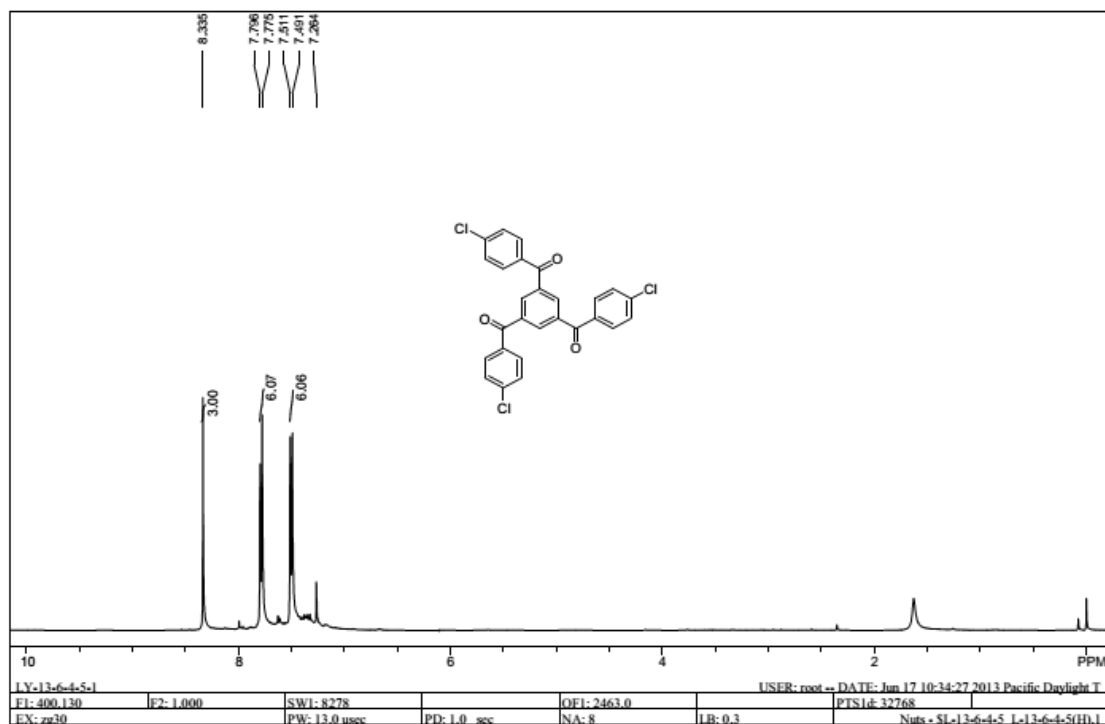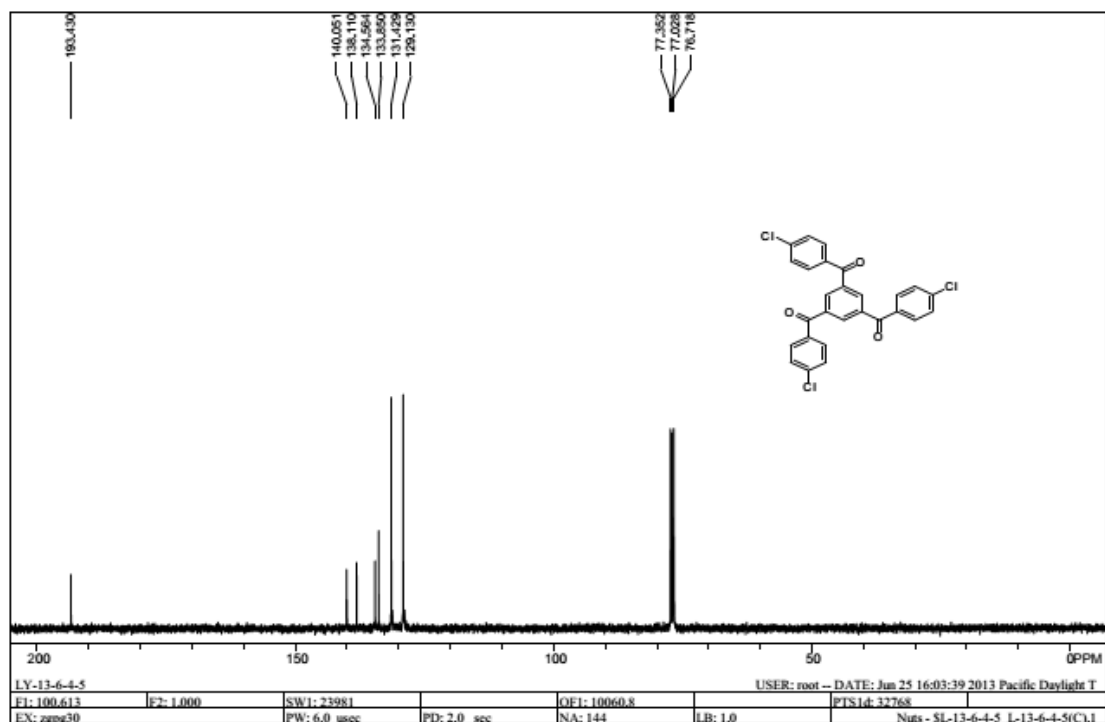

$^1\text{H}$  and  $^{13}\text{C}$  NMR spectra of **3g**

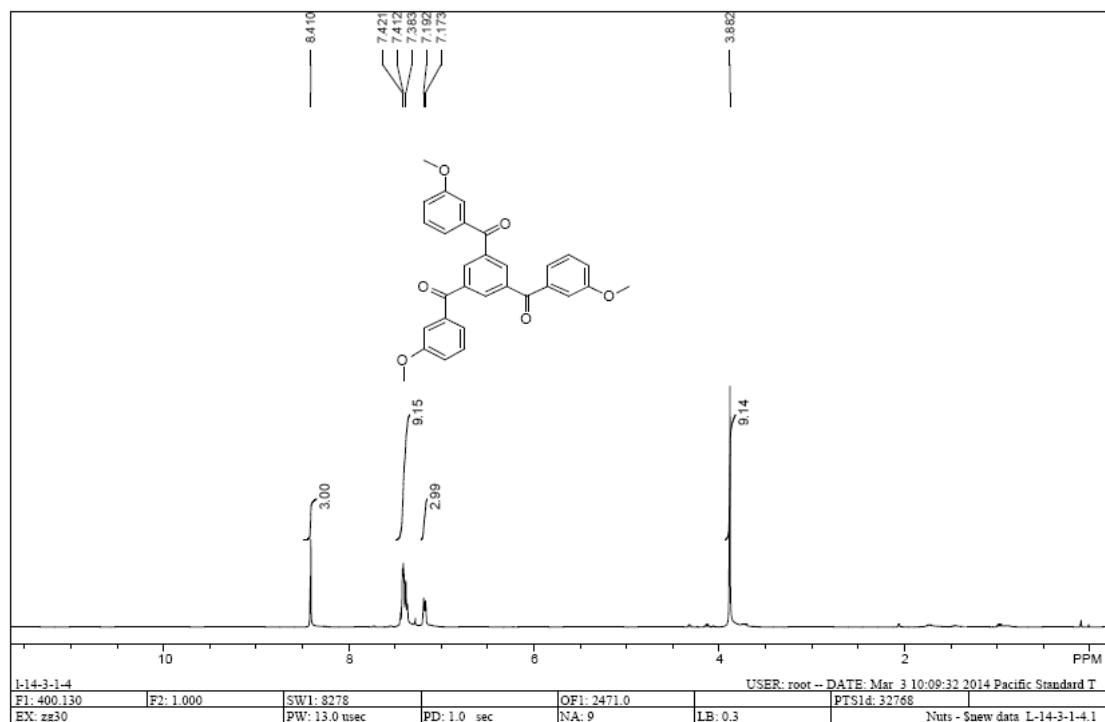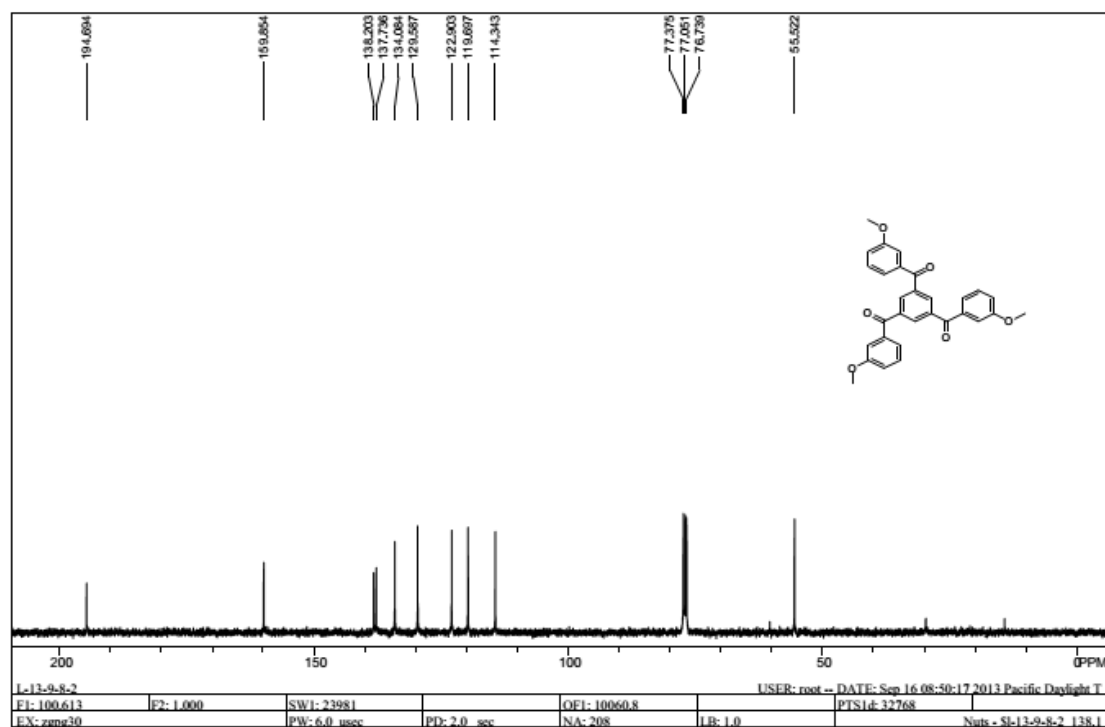



$^1\text{H}$  and  $^{13}\text{C}$  NMR spectra of **3h**

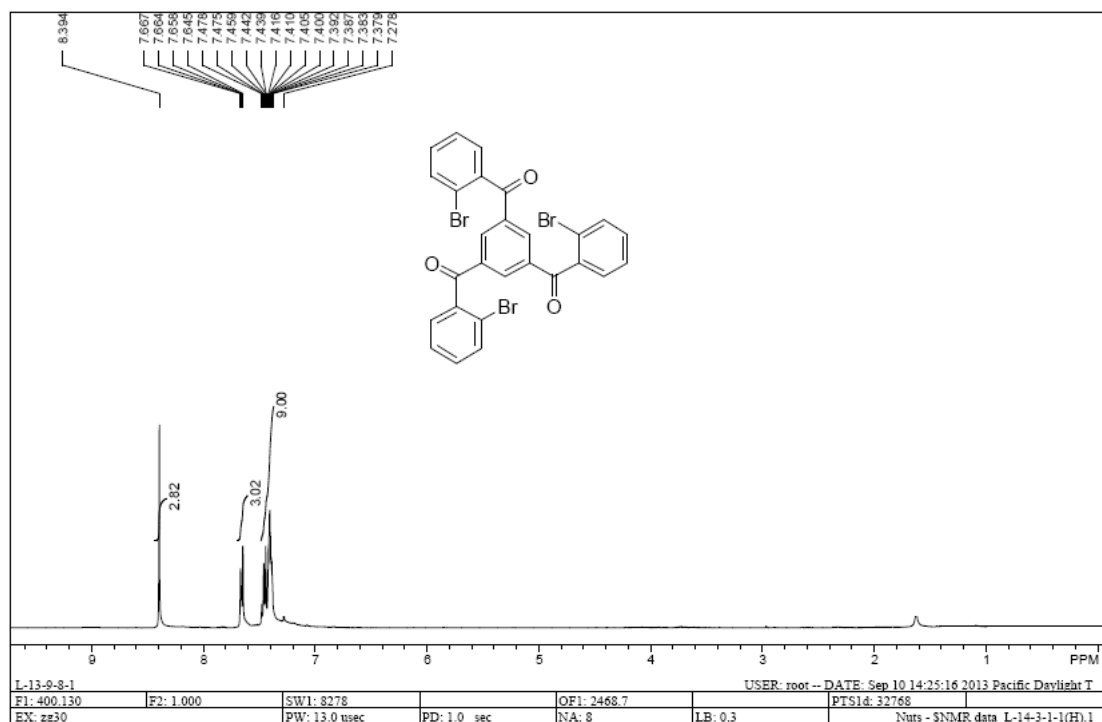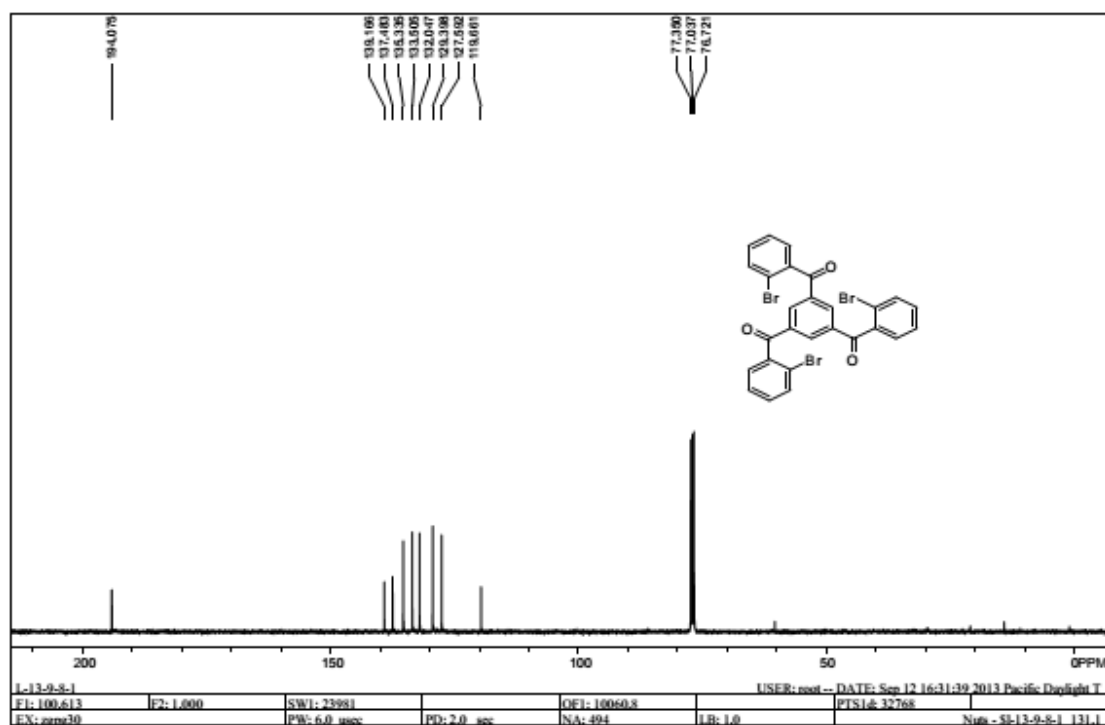

$^1\text{H}$  and  $^{13}\text{C}$  NMR spectra of **3i**

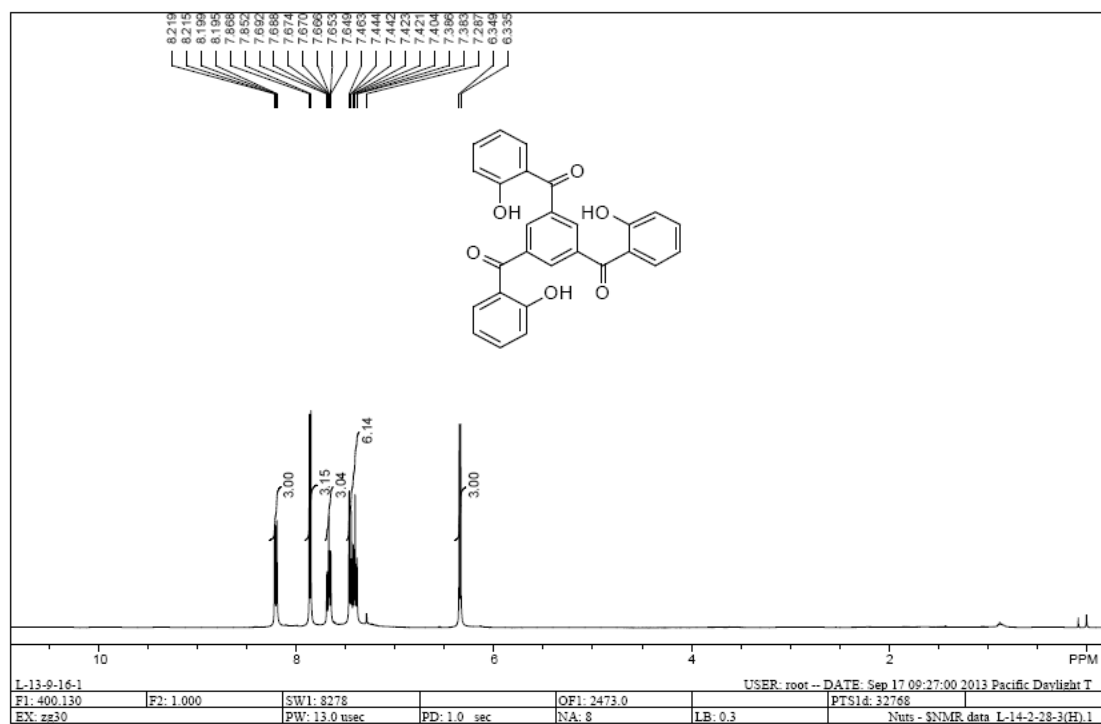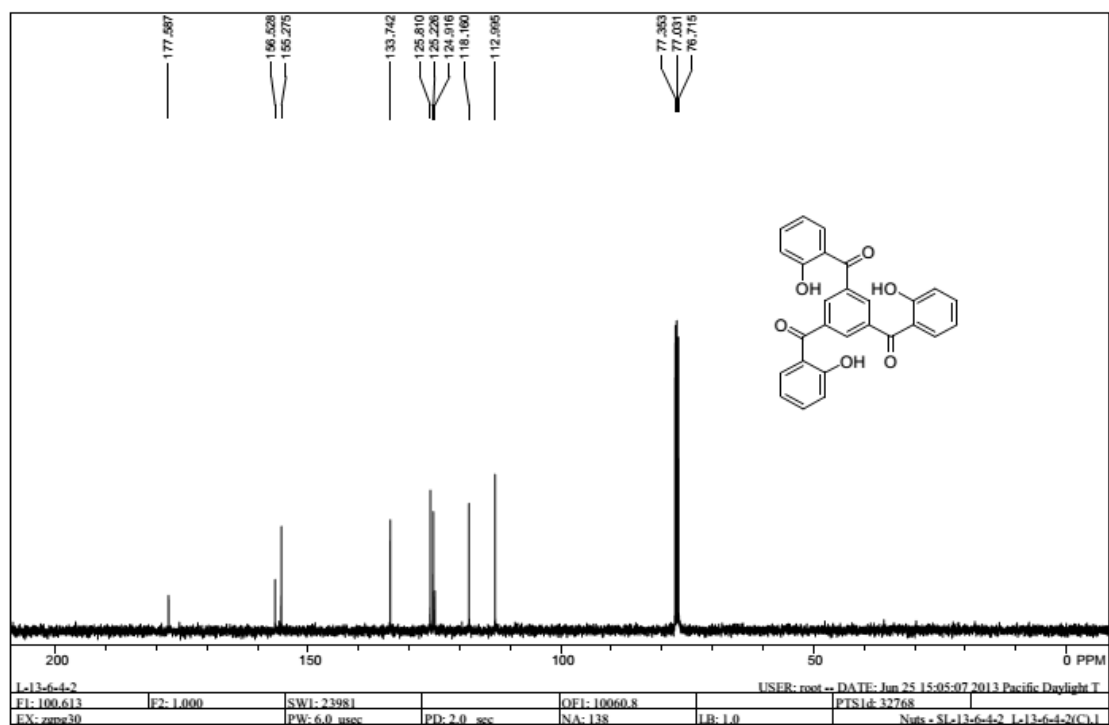

$^1\text{H}$  and  $^{13}\text{C}$  NMR spectra of **3j**

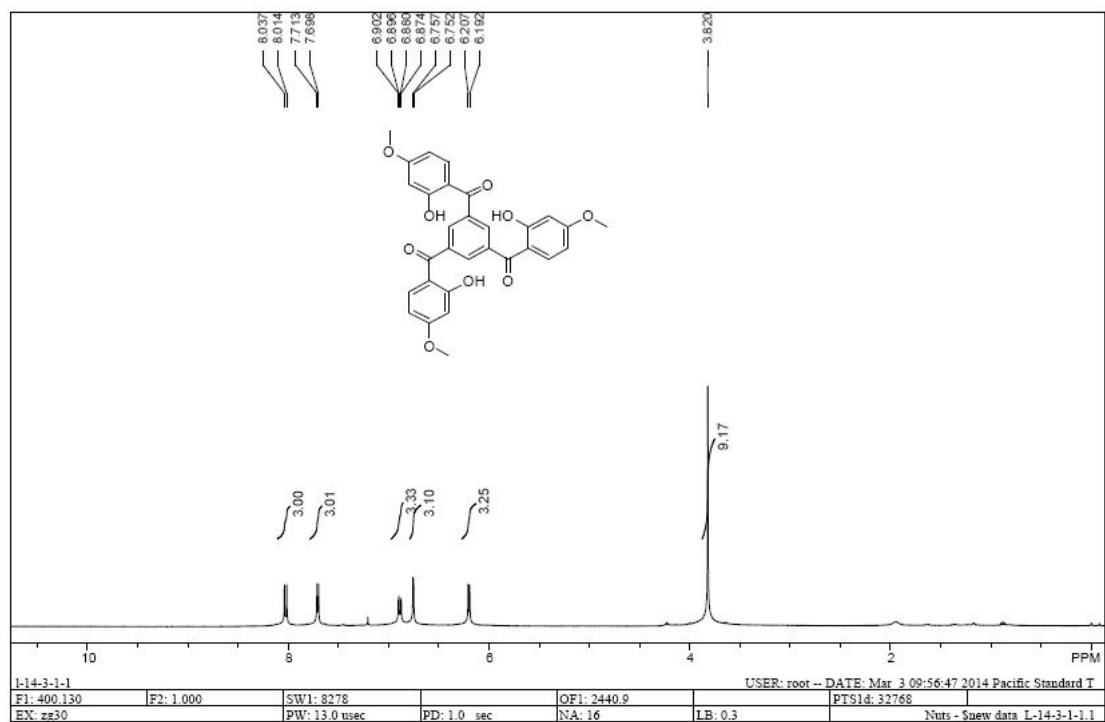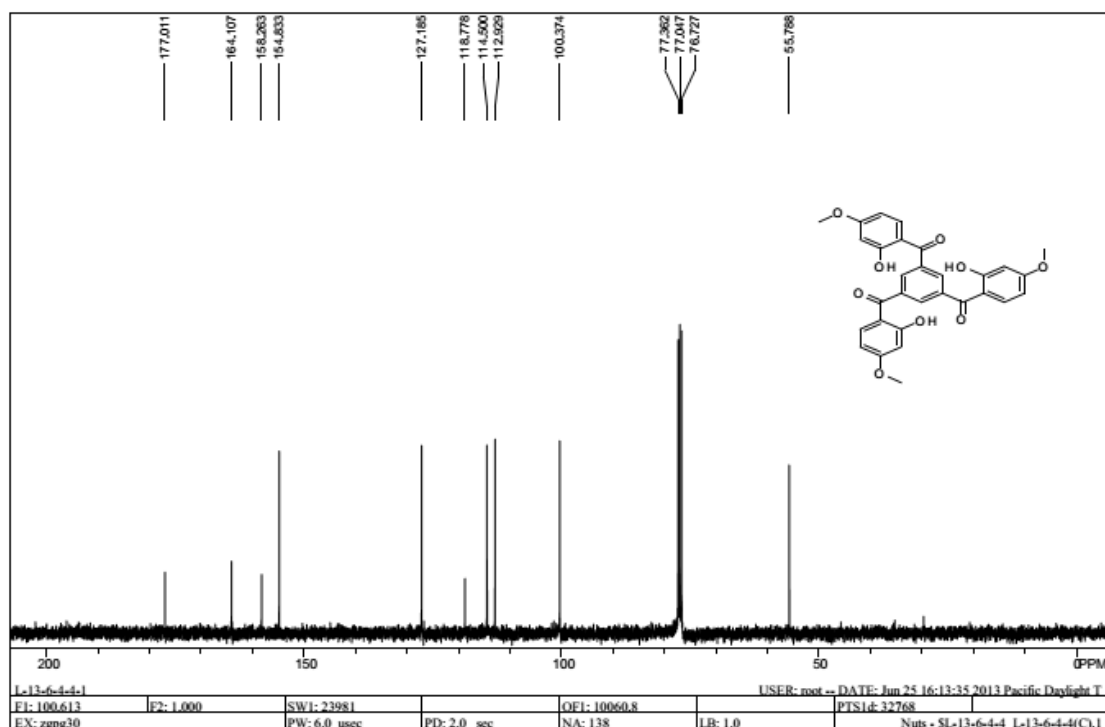

$^1\text{H}$  and  $^{13}\text{C}$  NMR spectra of **3k**

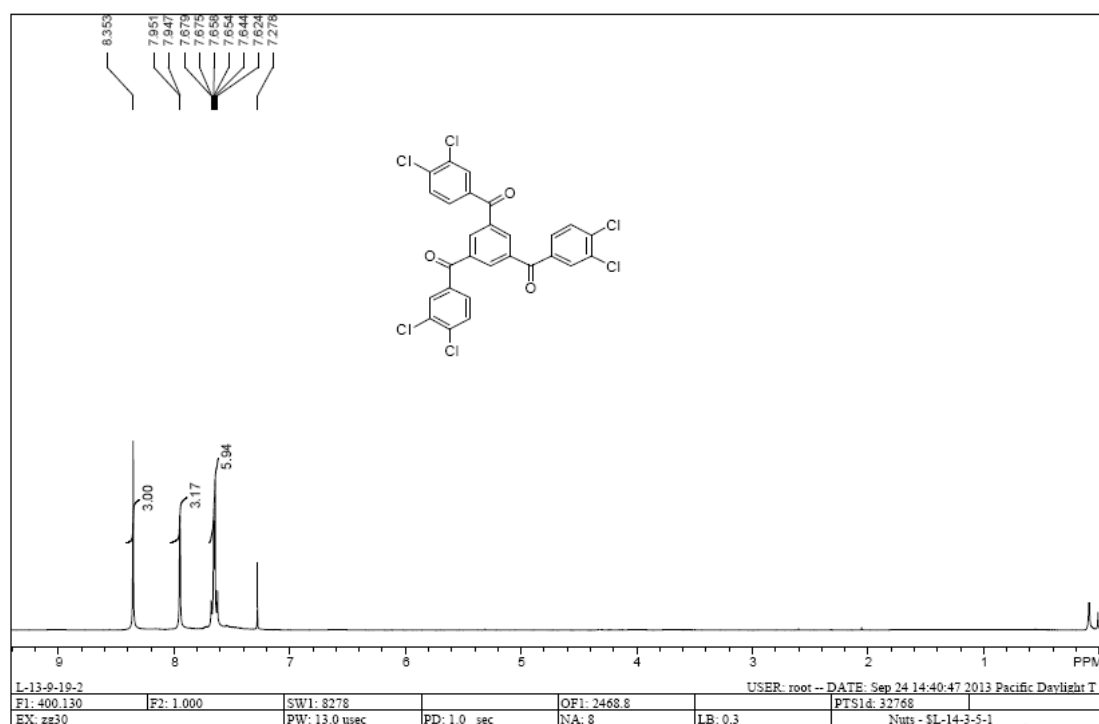

$^{13}\text{C}$  NMR was recorded in 600 MHz apparatus

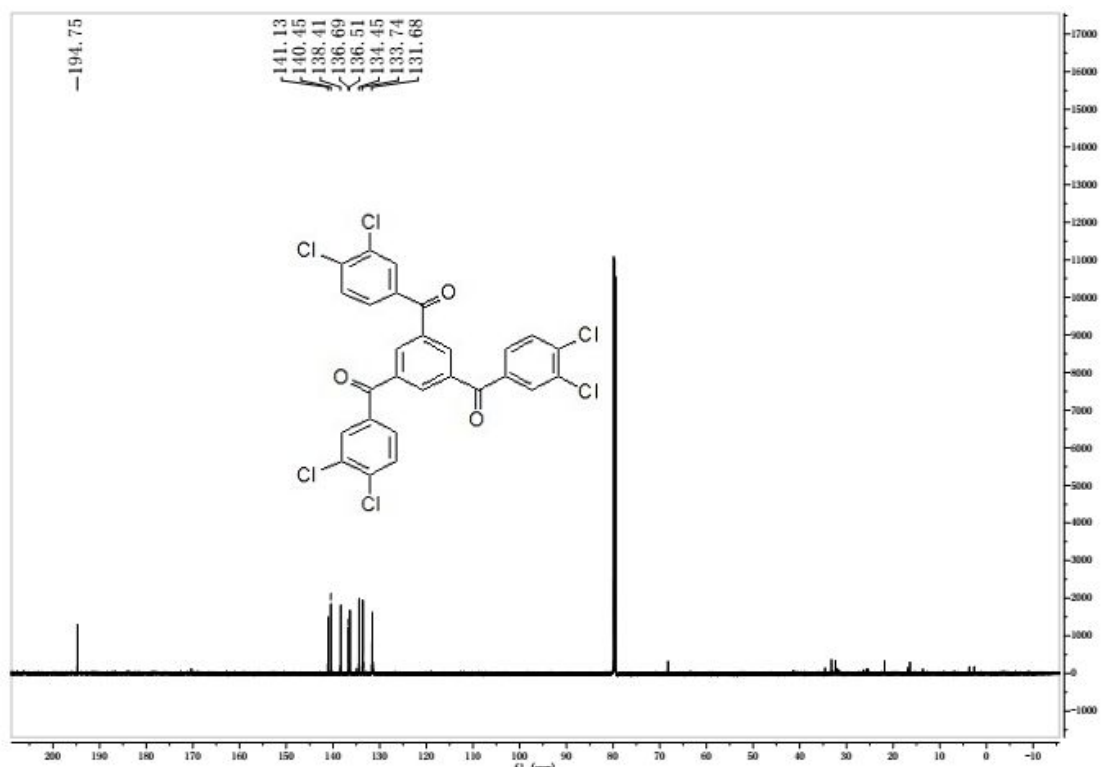

# $^1\text{H}$ and $^{13}\text{C}$ NMR spectra of **31**

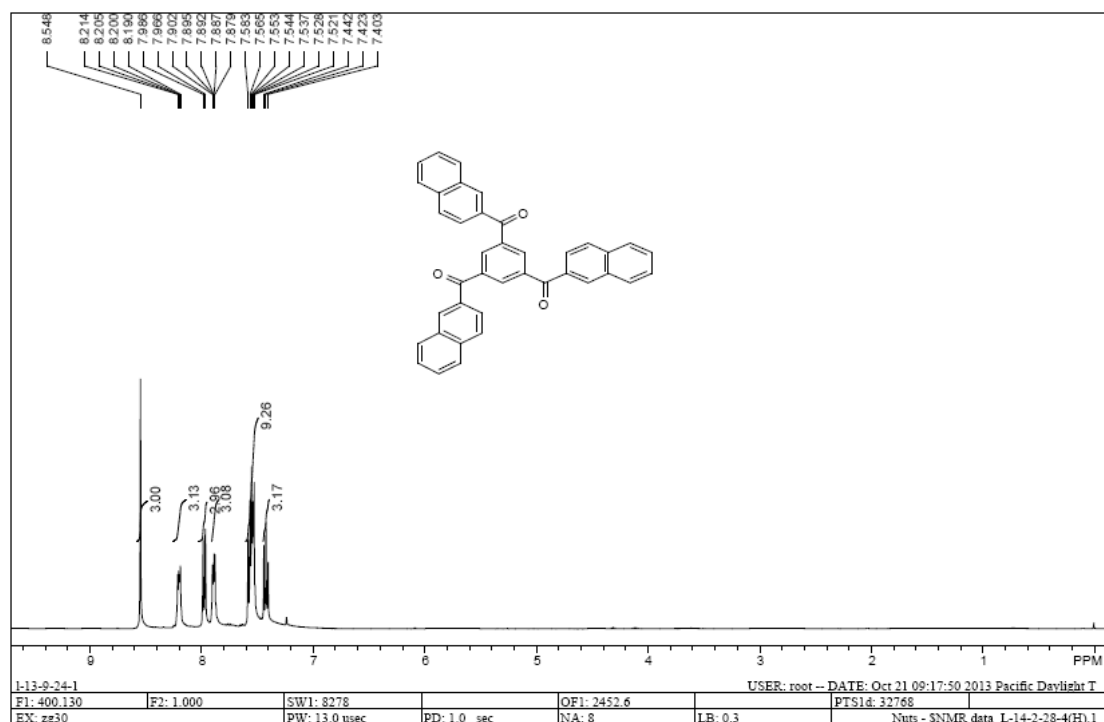

# $^{13}\text{C}$ NMR was recorded in 600 MHz apparatus

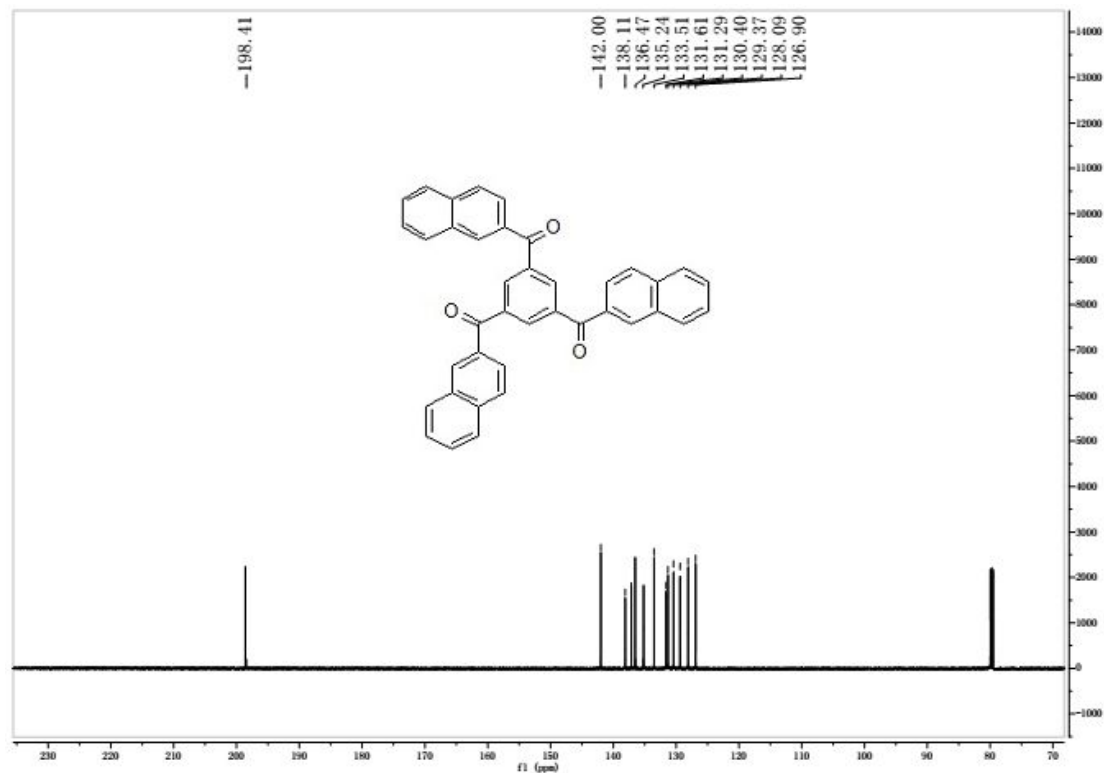

$^1\text{H}$  and  $^{13}\text{C}$  NMR spectra of **3m** (tested in  $\text{DMSO-}d_6$ )

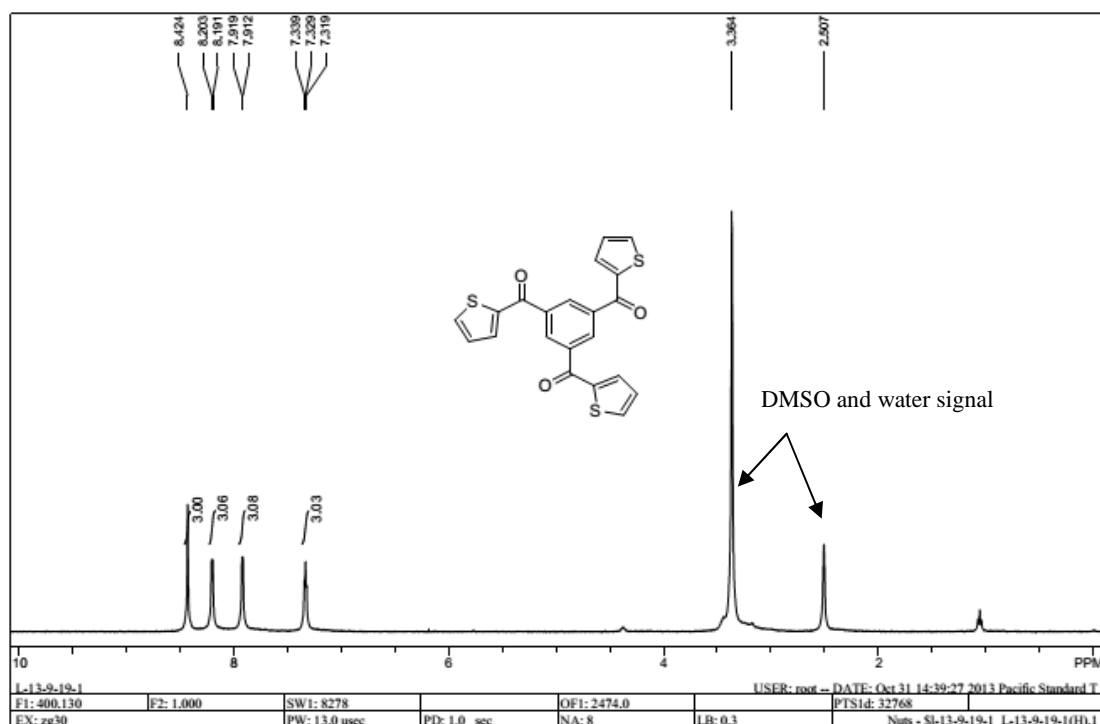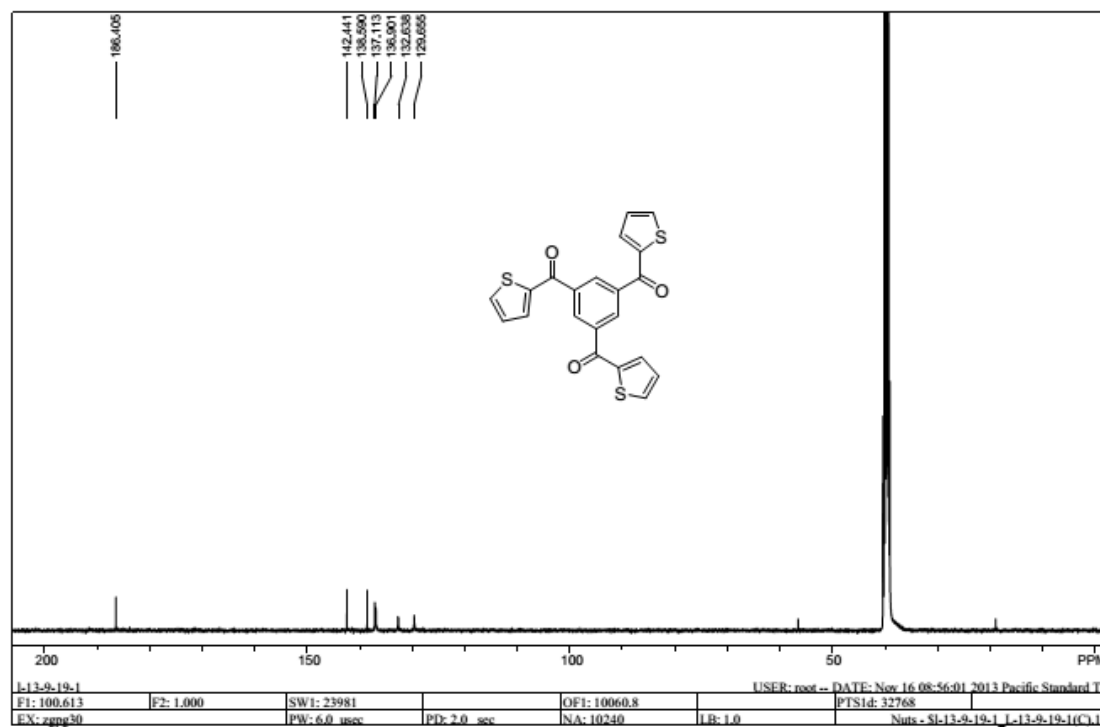

$^1\text{H}$  and  $^{13}\text{C}$  NMR spectra of **3n**

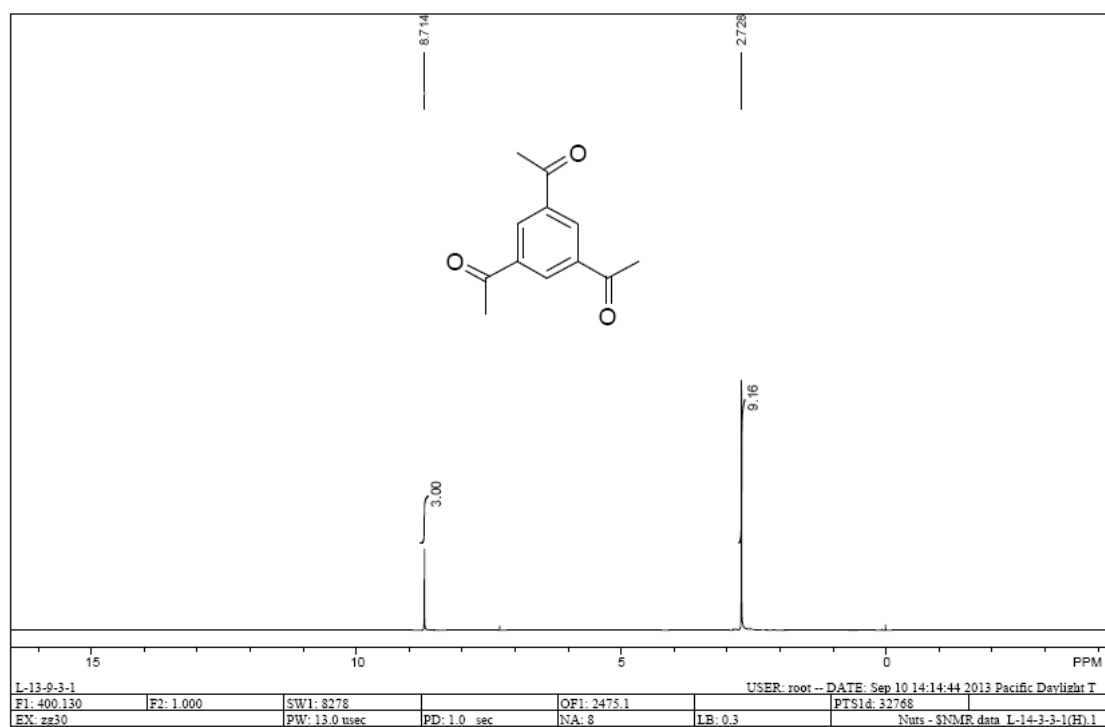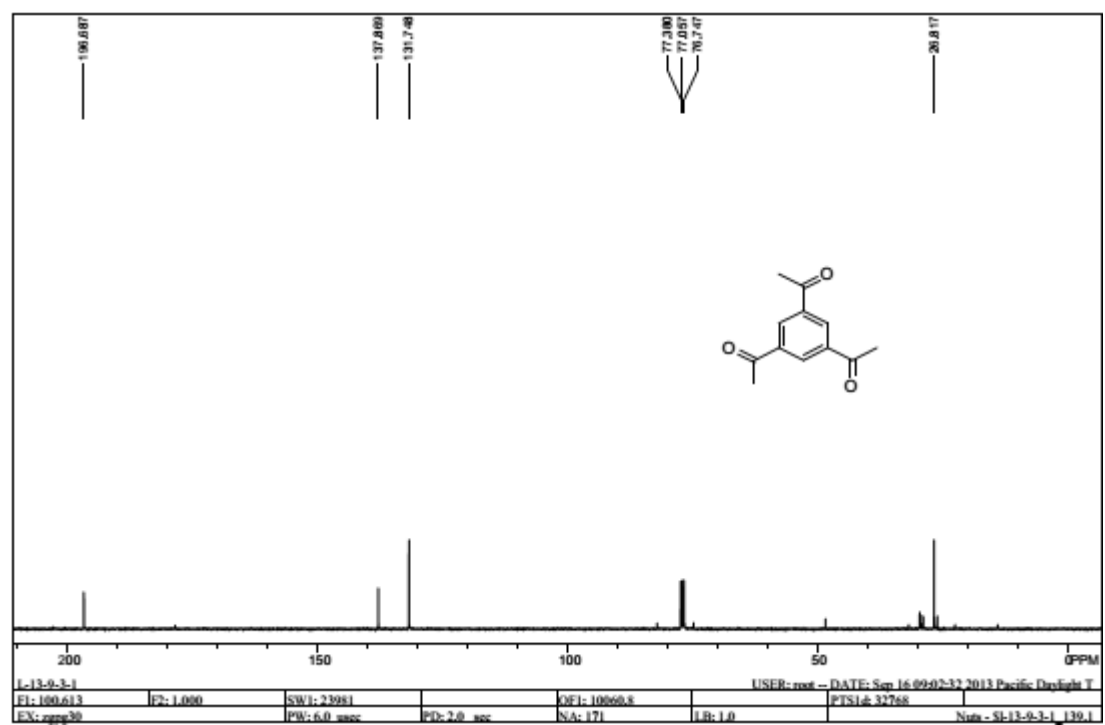

$^1\text{H}$  and  $^{13}\text{C}$  NMR spectra of **3o**

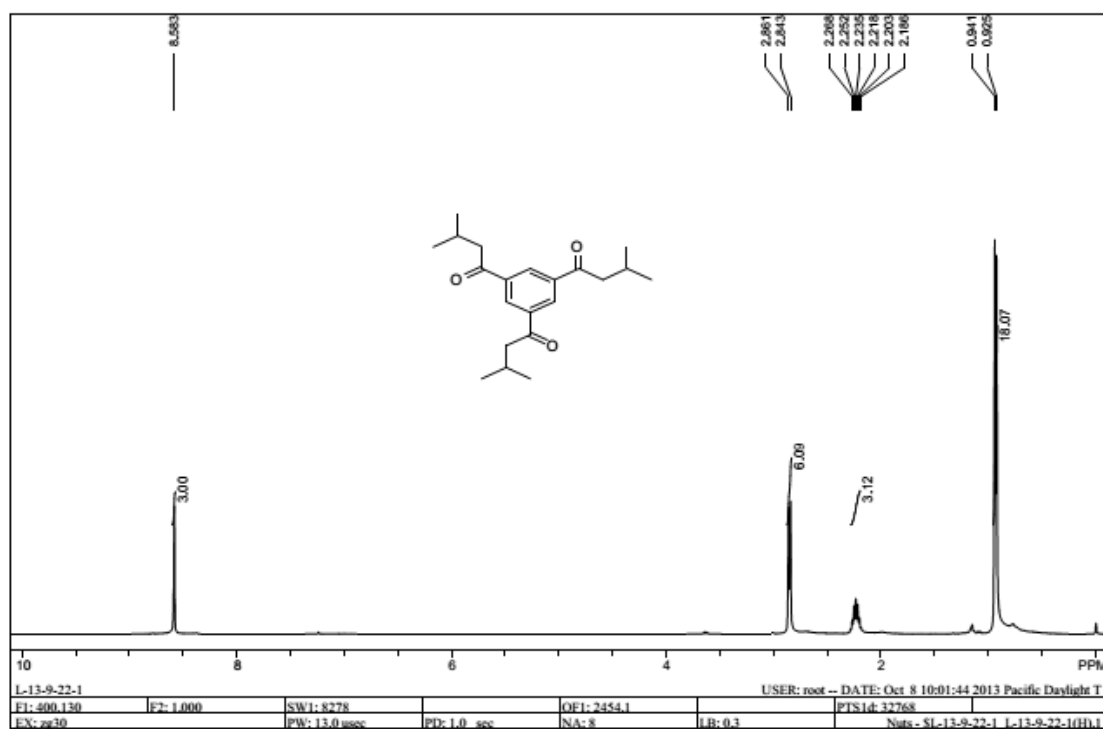

$^{13}\text{C}$  NMR was recorded in 600 MHz apparatus

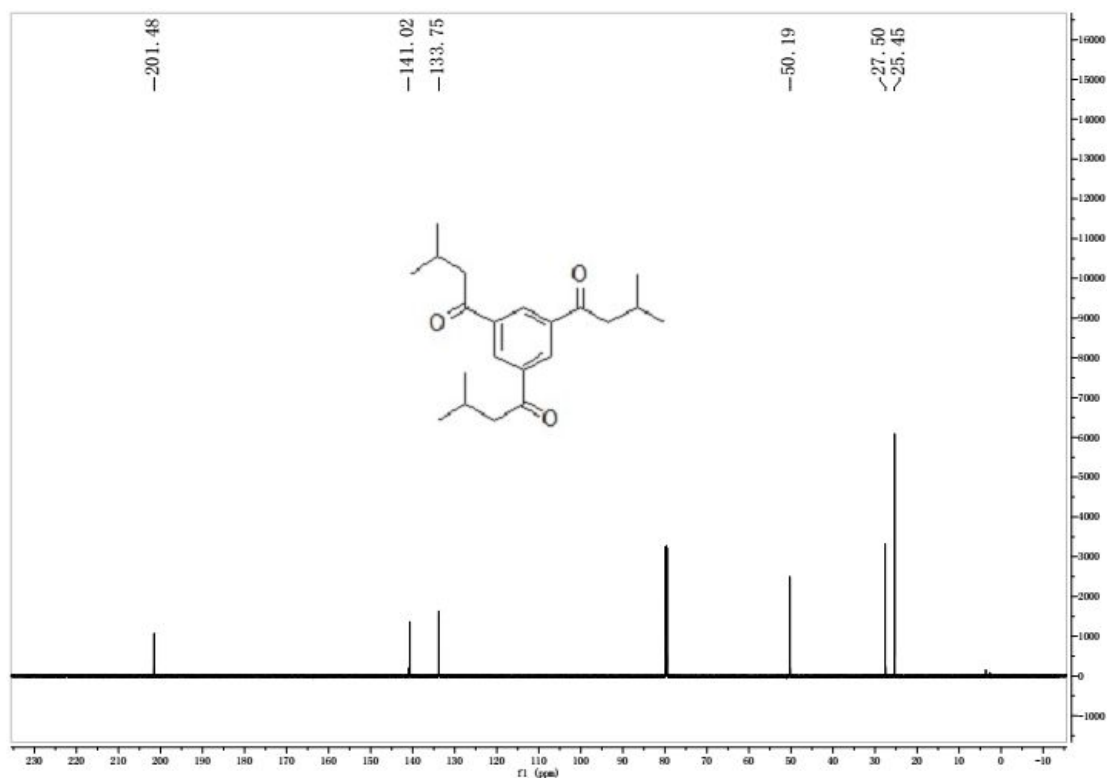



$^1\text{H}$  and  $^{13}\text{C}$  NMR spectra of **3cb**

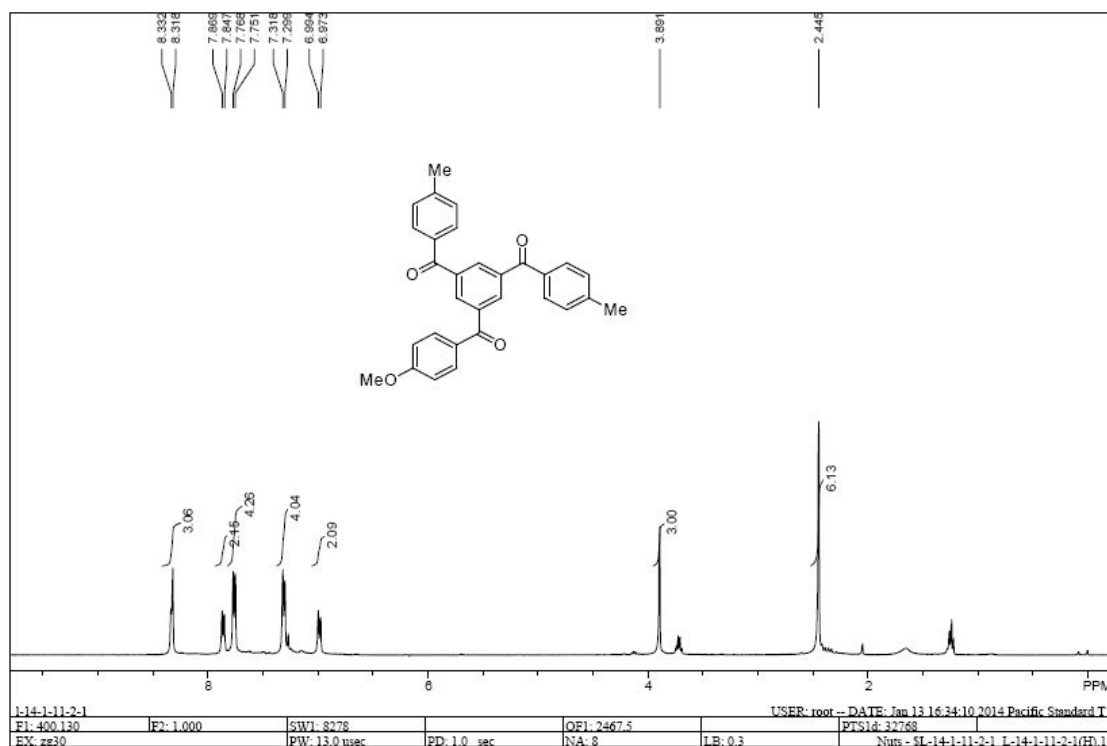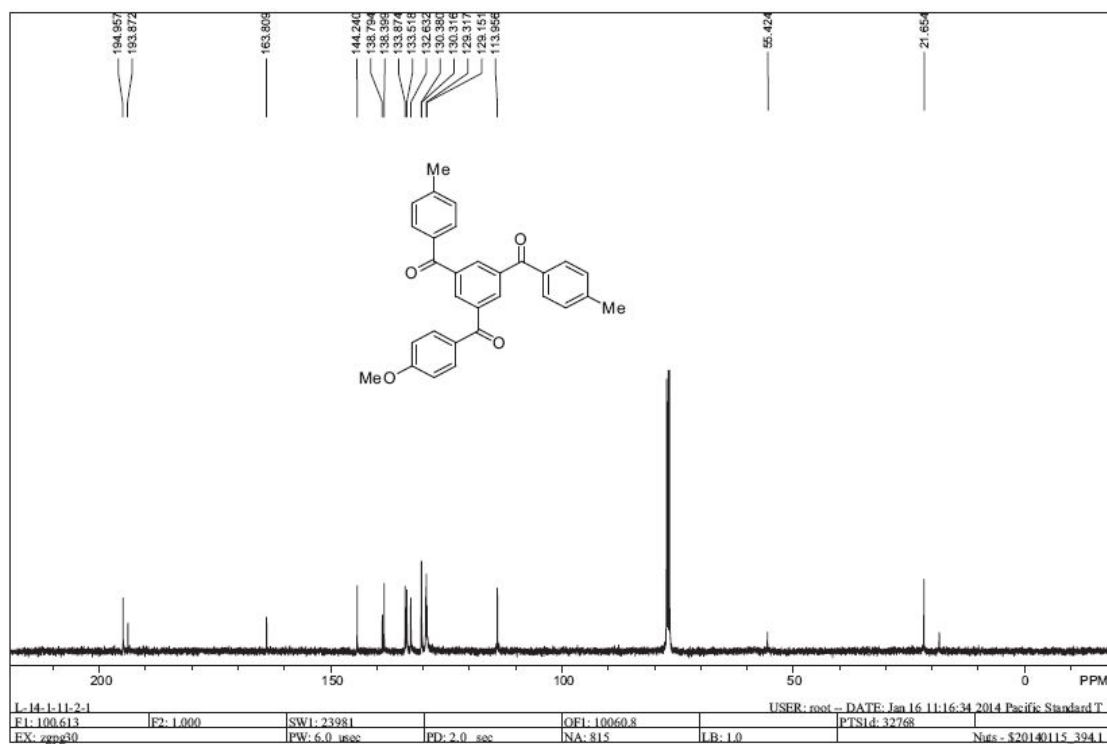

$^1\text{H}$  and  $^{13}\text{C}$  NMR spectra of **3bc**

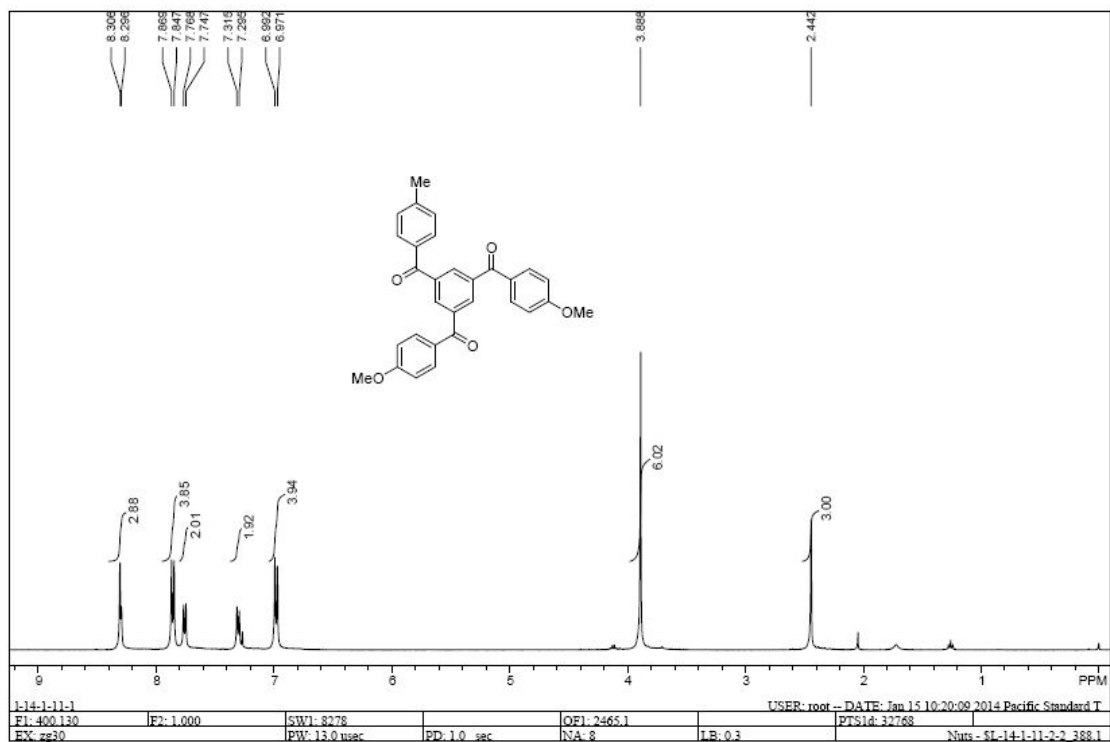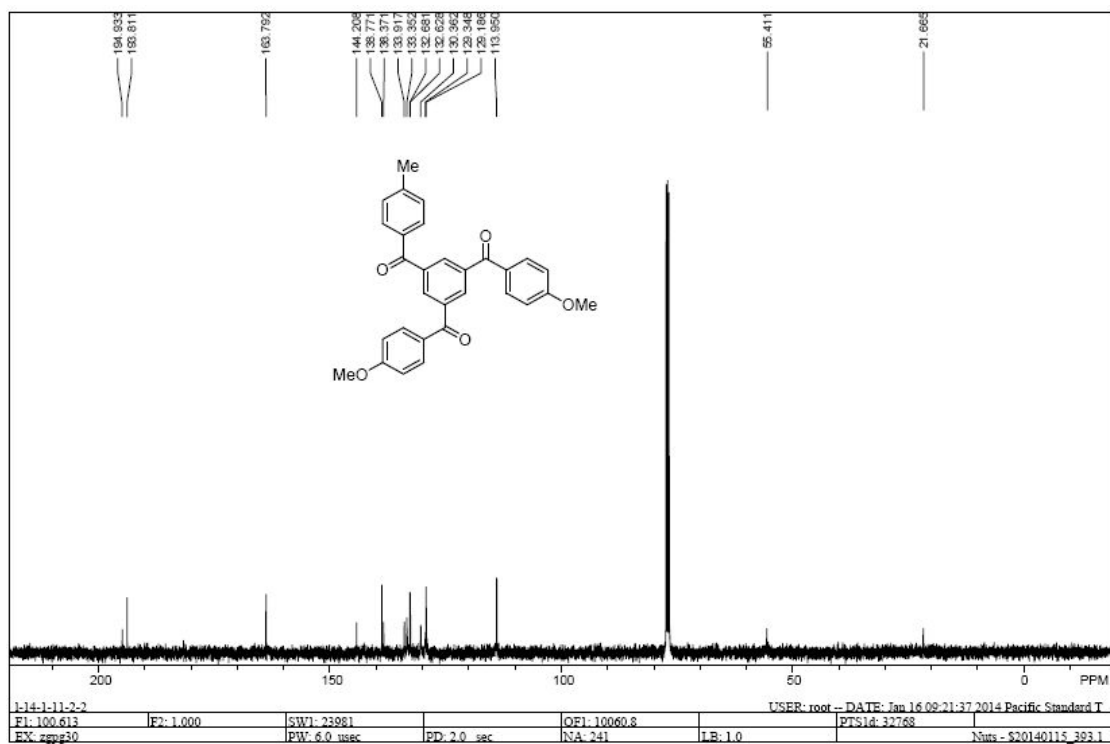

$^1\text{H}$  and  $^{13}\text{C}$  NMR spectra of **7a**

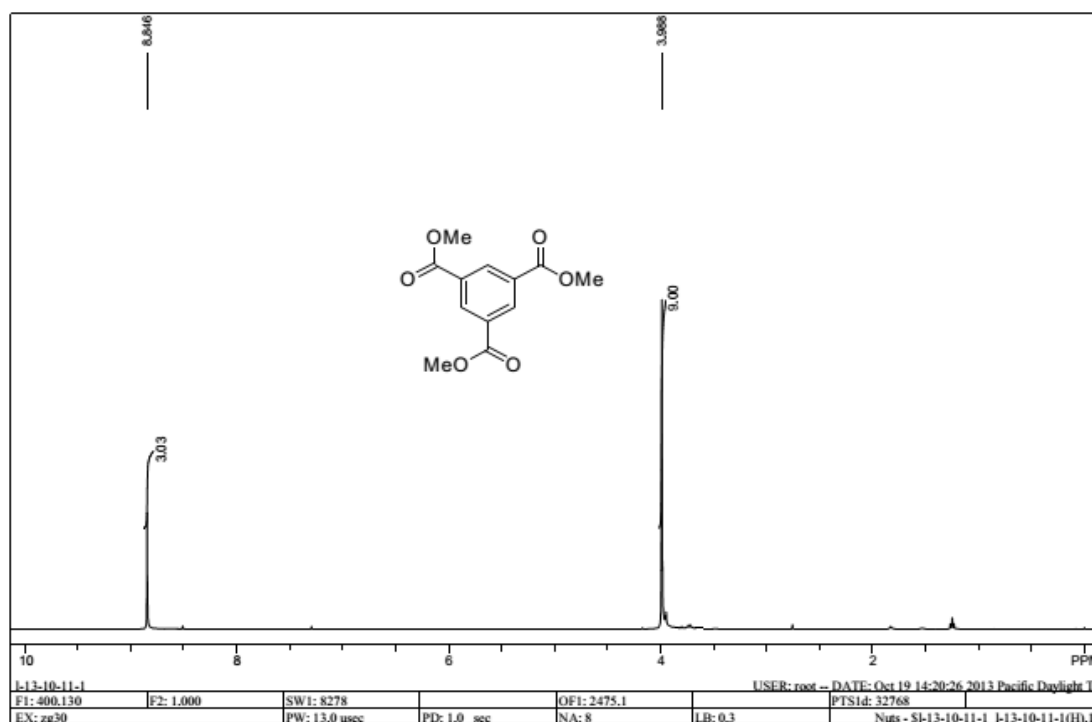

$^{13}\text{C}$  NMR was recorded in 600 MHz apparatus

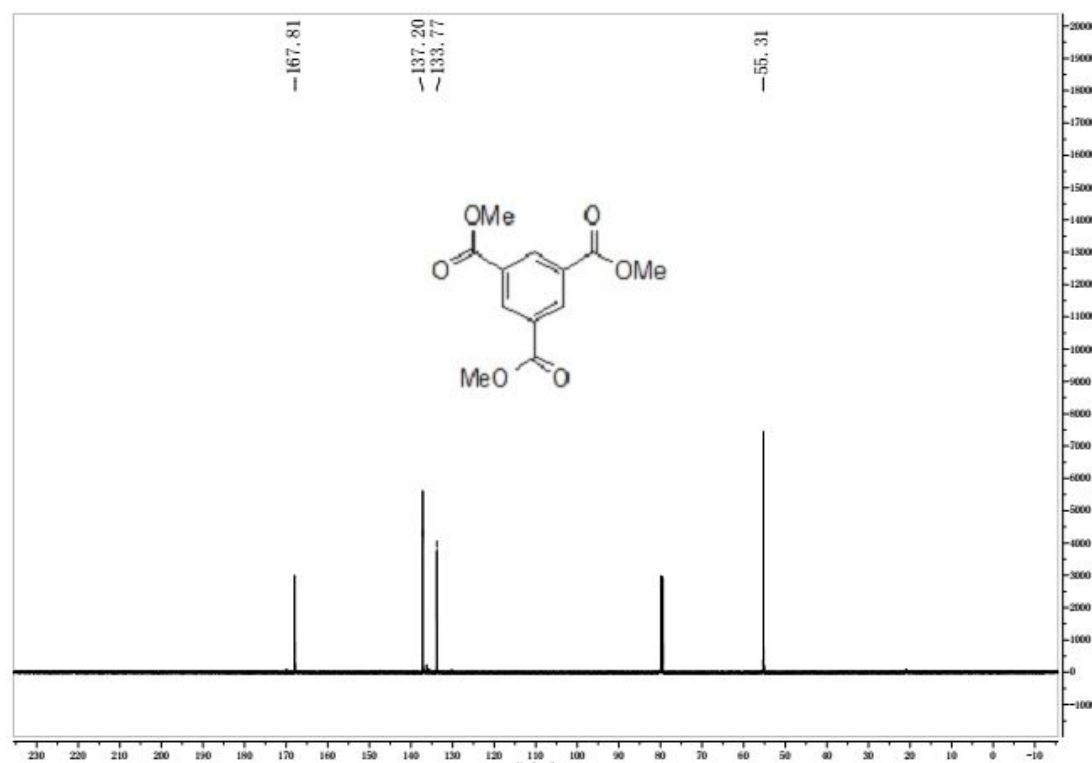

$^1\text{H}$  and  $^{13}\text{C}$  NMR spectra of **7b**

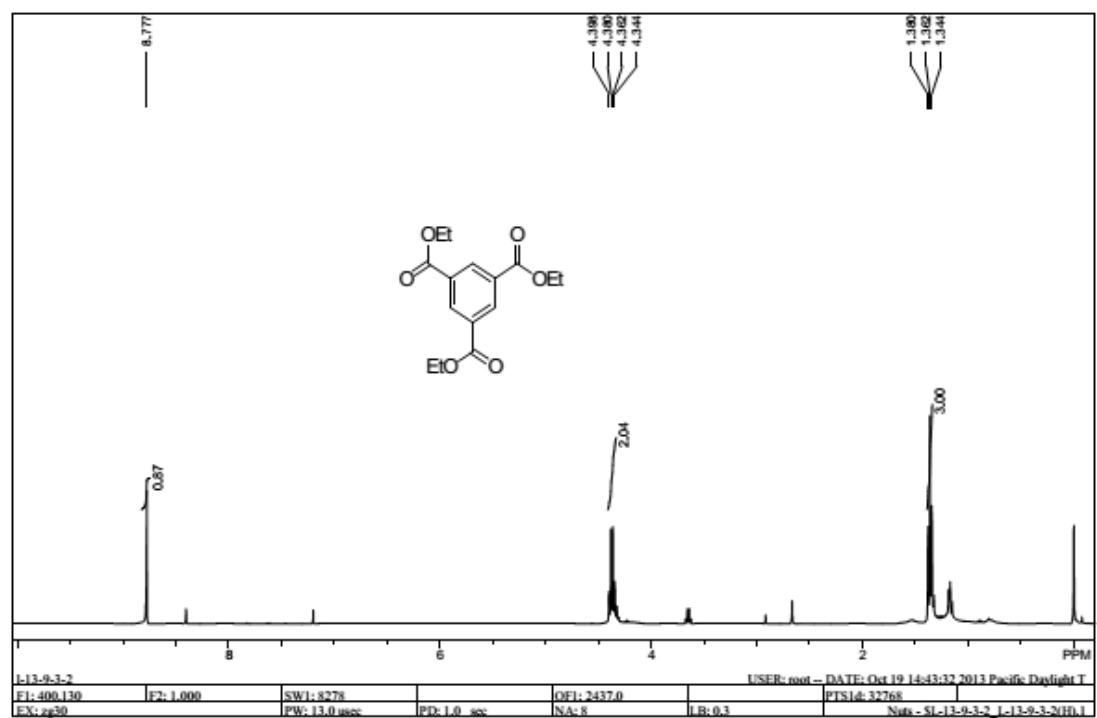

$^{13}\text{C}$  NMR was recorded in 600 MHz apparatus

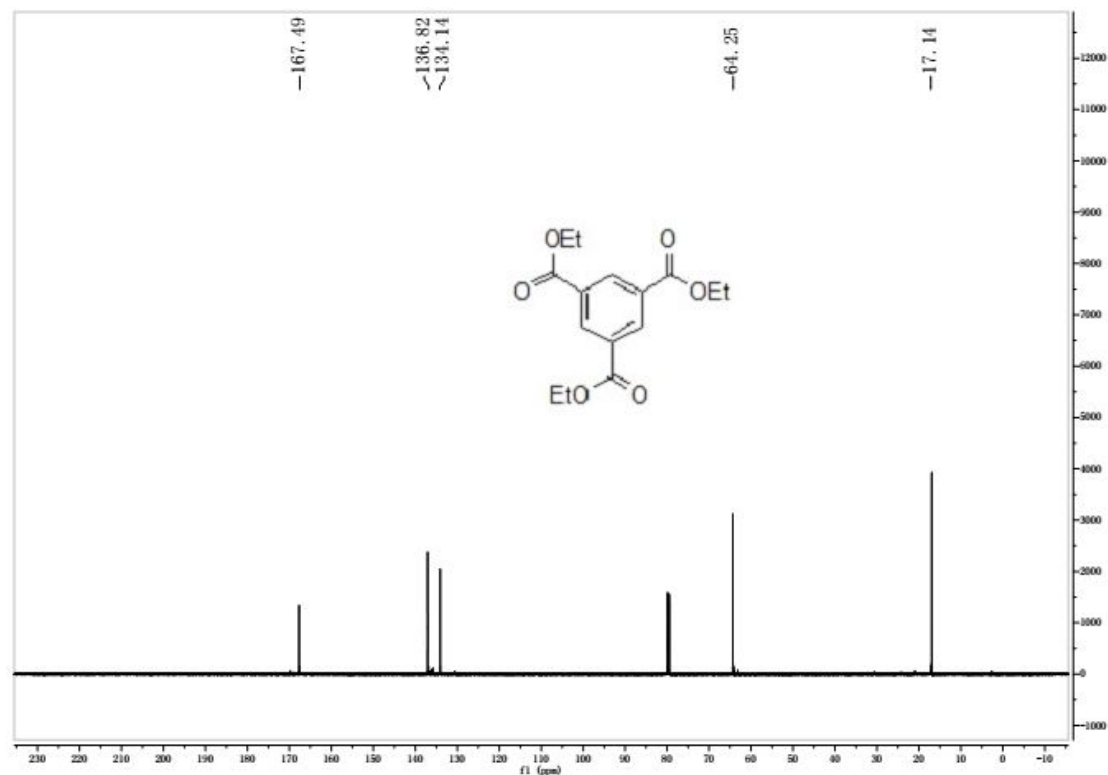

$^1\text{H}$  and  $^{13}\text{C}$  NMR spectra of **9**

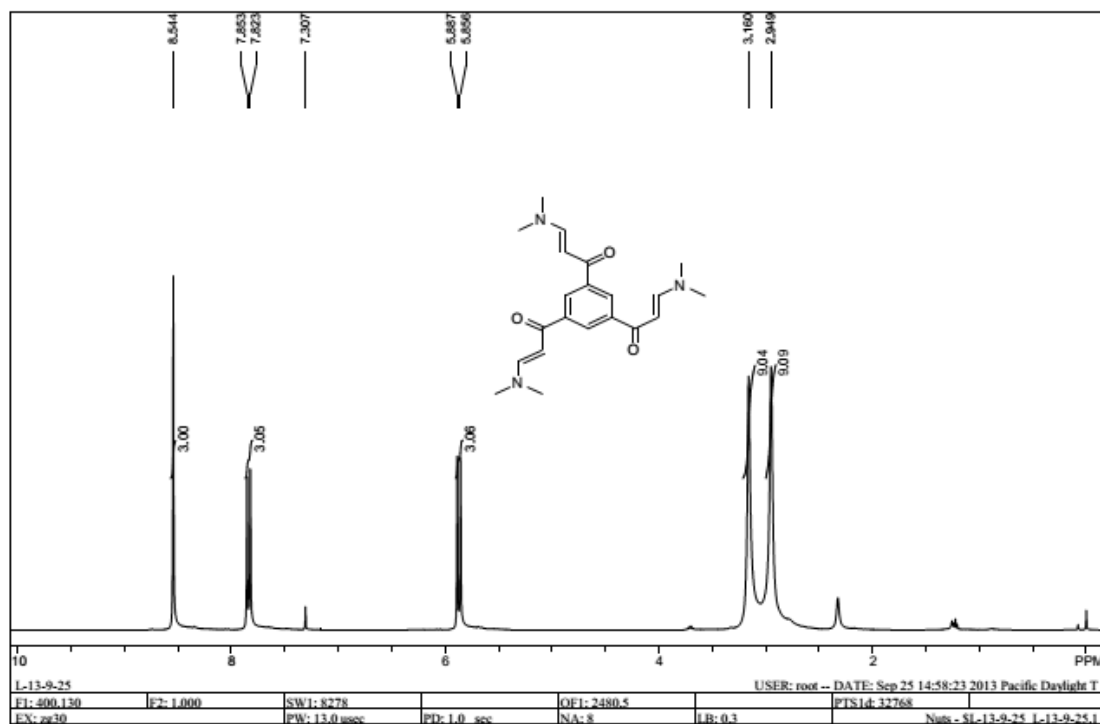

$^{13}\text{C}$  NMR was recorded in 600 MHz apparatus

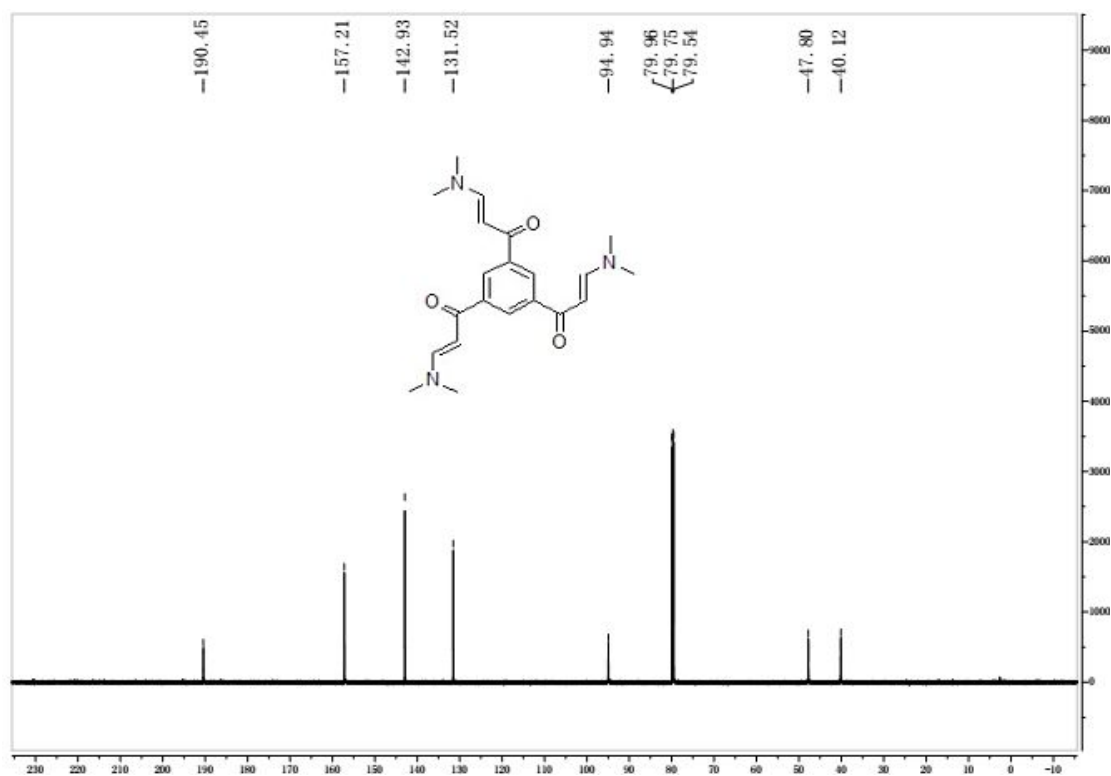

$^1\text{H}$  and  $^{13}\text{C}$  NMR spectra of **10**

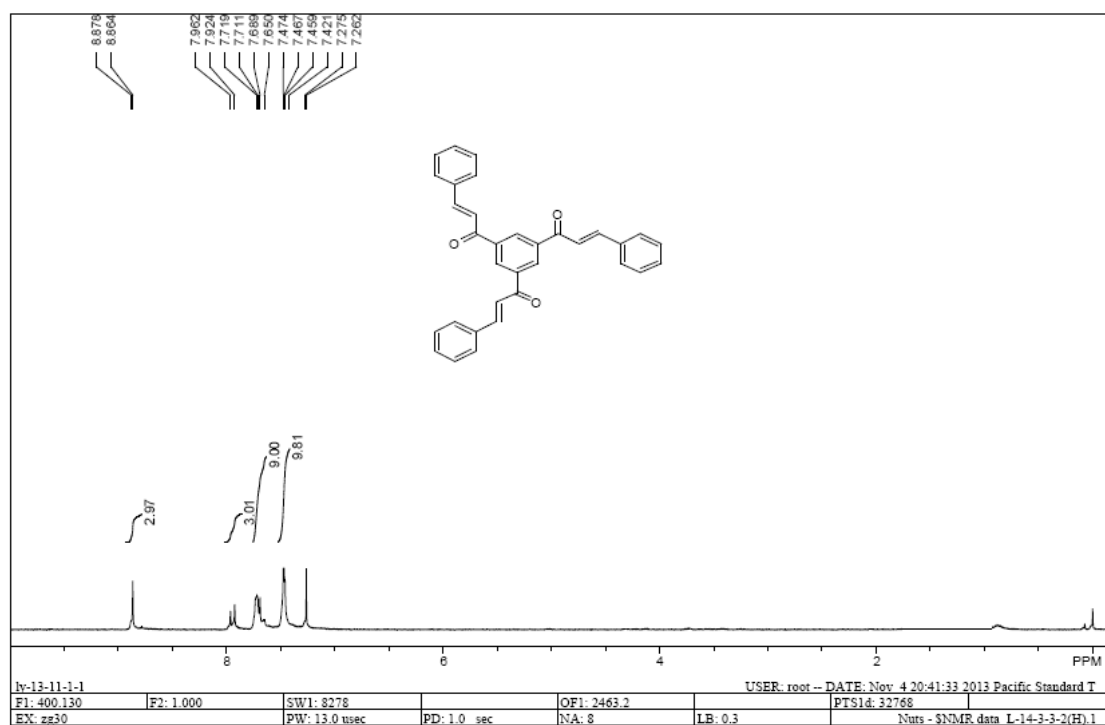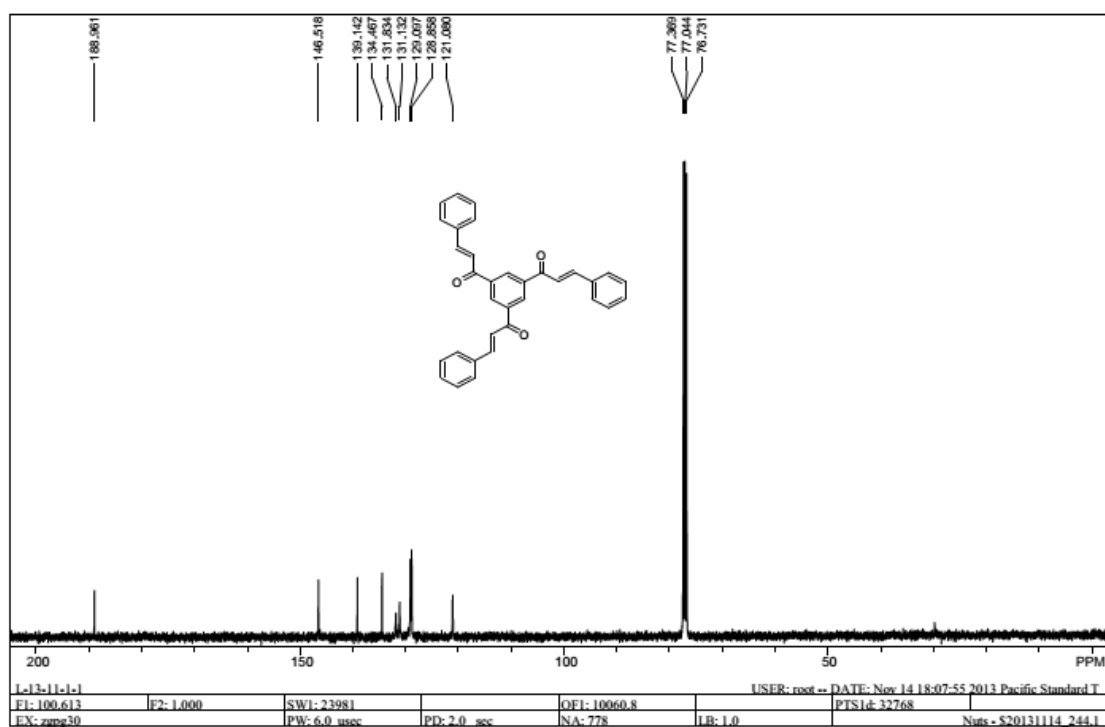

$^1\text{H}$  and  $^{13}\text{C}$  NMR spectra of **12a**

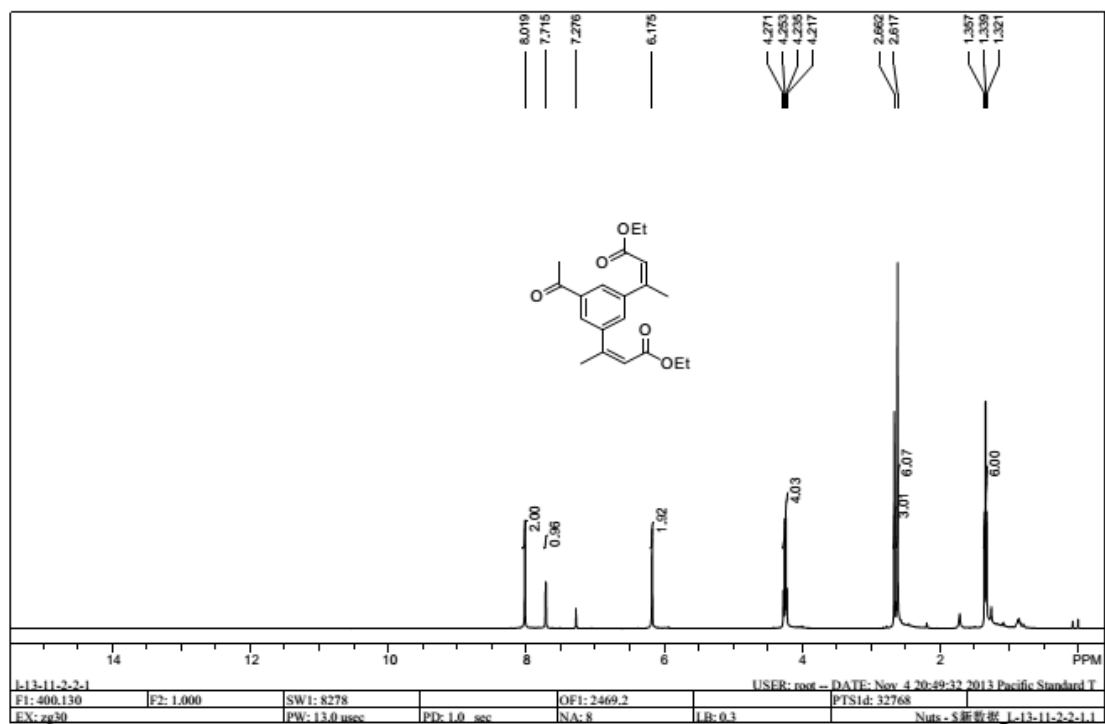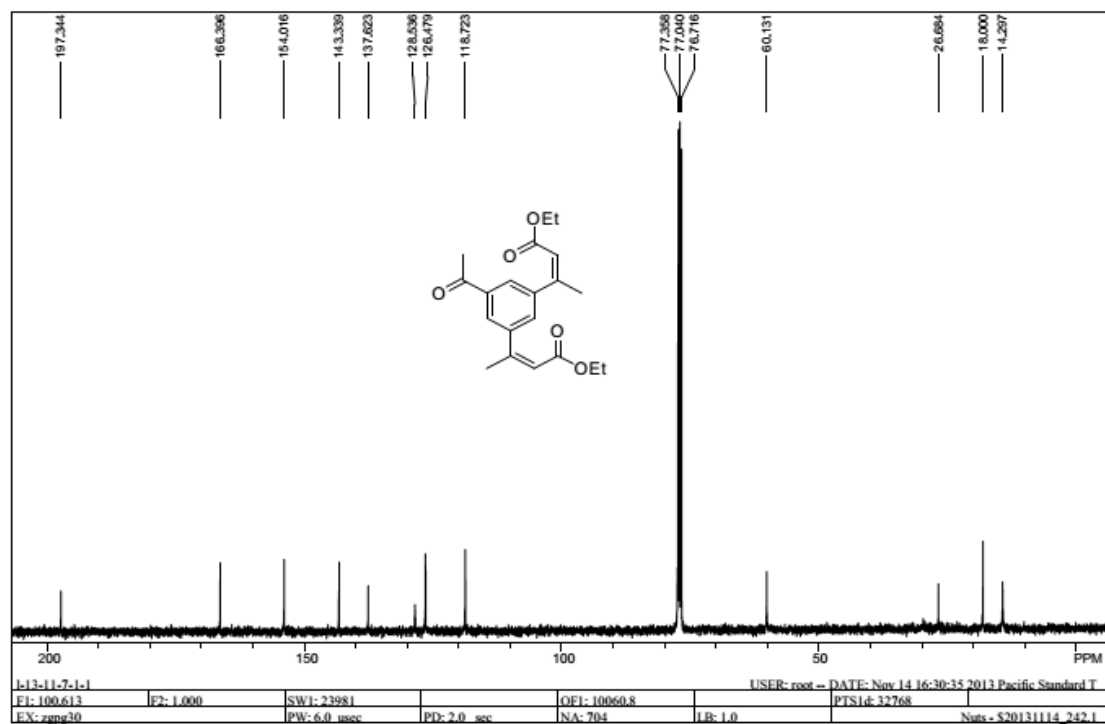

$^1\text{H}$  and  $^{13}\text{C}$  NMR spectra of **12b**

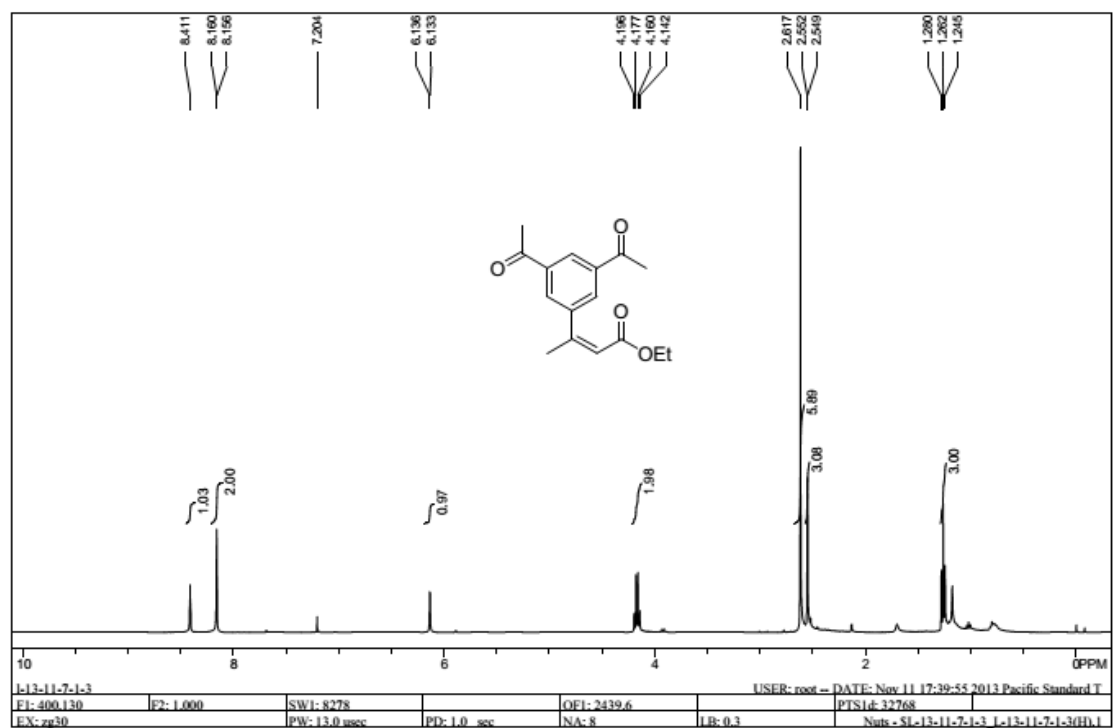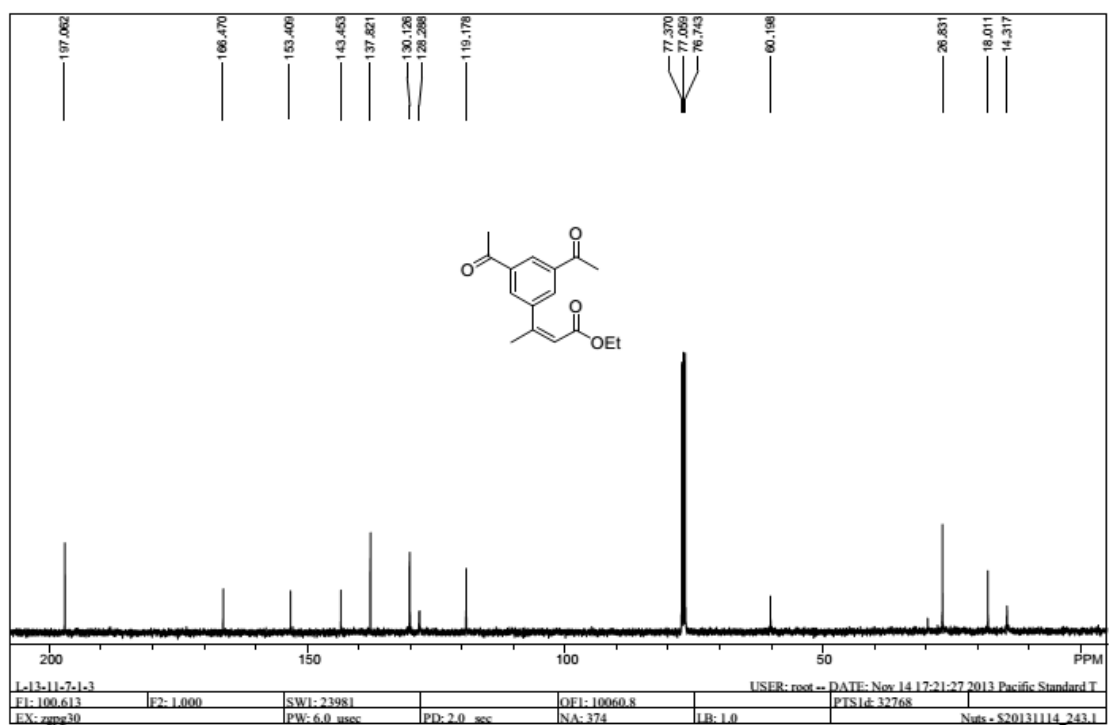

Supplement: c4ra00475b1.pdf [file c4ra00475b1.pdf]
